# Supplementary material for: Enhancing drought resilience in durum wheat: effect of root architecture and genotypic performance in semi-arid rainfed regions
Source: PeerJ. 2025 Mar 27;13:e19096. doi: 10.7717/peerj.19096 (PMC11955194; doi:10.7717/peerj.19096)
Supplement: Data S1 — All the data points of each single trait per genotype per year, which were used for statistical analyses. [file peerj-13-19096-s008.xlsx]

## Sheet: Legend
File 1. Raw data for traits measured in the field experiments under drought (2017) and wet (2018) conditions. See below for trait names and abbreviations, and "Data" sheet for actual data
Abbreviation	Trait
AGB, t ha-1	Above ground biomass
CT, °C	Canopy temperature
DTH, days	Days to heading
FLA, mm2	Flag leaf area
FLDW, mg	Flag leaf dry weight
FLFW, mg	Flag leaf fresh weight
FLL, cm	Flag leaf length
FLW, cm	Flag leaf width
GNA	Grain number per area
GNS	Grain number per spike
HI	Harvest index
LRM	Leaf rooling index at morning
LRN	Leaf rooling index at noon
PEM, seedlings per area	Plant emergence
PGY, Mg ha-1	Plot grain yield
PH, cm	Plant height
RWC, %	Relative water content
SLW, mg cm-2	Specific leaf weight
SNA	Spike number per area
SpkBio, Mg ha-1	Spike biomass
StemBio, Mg ha-1	Stem biomass
SWA, Mg ha-1	Spike weight per area
TKW, g	Thousand kernel weight

## Sheet: Data
N°	Year	Block	Genotype	Type	PGY	AGB	DTH	PEM	FLA	GNA	HI	PH	RWC	SLW	CT	SNA	GNS	LRN	TKW	StemBio	SpkBio	SWA	FLL	FLW	FLFW	FLDW	LRM
4	2018	1	Acsad 65	Cultivar	4.9564	16.4383	119	189.286	2121.11	7577.85	0.259075	85.1	89.8858	0.0725894	31.4	320	23.6808	3	56.2	11.8554	4.58285	8.8416	21.5	1.38	343.11	153.97	2
5	2018	1	Altar 84	Cultivar	4.81623	12.8858	118	160.714	1702.61	5198.27	0.200414	79.4	94.1257	0.070351	28.4	250	20.7931	2	49.68	9.01417	3.87167	6.45417	18.32	1.3	277.18	119.78	1
9	2018	1	Bidi 17	Landrace	3.9061	11.1657	127	232.143	2167.36	6972.93	0.325237	109	94.3351	0.0674645	29.6	192.5	36.223	5	52.08	9.0145	2.1512	5.7827	21.35	1.42	329.46	146.22	4
2	2018	1	Bousselem	Cultivar	5.37727	10.0007	123	164.286	2079.74	8525.68	0.466494	81	86.6589	0.0767017	35.4	232.5	36.6696	3	54.72	7.19492	2.80575	7.471	21.71	1.34	337.06	159.52	2
24	2018	1	Boutaleb	Cultivar	4.5435	10.3189	125	128.571	3809.67	6829.61	0.37911	103.625	88.5846	0.0377145	26.2	247.5	27.5944	2	57.28	8.446	1.8729	5.7849	19.52		345.63	143.68	2
23	2018	1	Capeiti	Cultivar	5.25807	15.8715	115	185.714	1954.47	12239	0.395126	104.125	79.985	0.0684791	31.4	380	32.2078	3	51.24	13.1596	2.71195	8.9832	21.03	1.3	319.32	133.84	2
20	2018	1	Cirta	Cultivar	6.20817	25.3215	123	203.571	2348.7	3415.57		88.5		0.0709625	29.4	392.5	8.7021	4	51.88	15.5343	9.78712	11.5591	21.06	1.56	425.91	166.67	3
8	2018	1	Gloire de Montgolfier	Landrace	3.34063	12.1979	128	203.571	2926.49	6573.07	0.267711	121.4	94.5035	0.065758	30.6	202.5	32.4596	2	49.68	9.9115	2.28638	5.55187	24.66	1.66	490.21	192.44	1
16	2018	1	GTA Dur	Cultivar	6.6898	15.543	120	167.857	2537.18	10574.8	0.362494	86.6	92.1901	0.0613476	29.4	327.5	32.2894	4	53.28	11.3719	4.1711	9.80535	21	1.69	417.69	155.65	4
11	2018	1	Guemgoum R'khem	Landrace	2.96727	9.77918	130	196.429	2077.33	4428.39	0.303221	115.9	93.8864	0.0762566	30.8	172.5	25.6718	4	66.96	7.38658	2.3926	5.35785	22.88	1.27	321.32	158.41	3
14	2018	1	Hedba 3	Landrace	4.13383	15.8628	129	189.286	2487.08	5731.83	0.186884	131.1	92.8866	0.0582289	29.6	215	26.6597	3	51.72	11.3868	4.47593	7.44043	21.88	1.59	384.65	144.82	2
17	2018	1	INRAT 69	Cultivar	5.5271	16.3778	121	196.429	2375.33	9830.86	0.322936	99	91.8774	0.0625177	29.4	325	30.2488	4	53.8	11.737	4.64083	9.92983	22.45	1.48	355.8	148.5	3
13	2018	1	Korifla	Cultivar	4.9742	8.80533		260.714	1598.7	7625.76	0.456229	81.2	92.86	0.0640085	30.6	200	38.1288	2	52.68	7.53592	1.26942	5.28667	17.89	1.25	271.8	102.33	1
26	2018	1	Langlois	Landrace	3.13557	13.8422	130	217.857	2100.55	8481.1	0.314438	133.625		0.057799	31.6	230	36.8743	3	51.32	11.6742	2.168	6.5205	18.25	1.61	312.8	121.41	3
21	2018	1	Mansourah	Cultivar	4.6433	19.9288	124	175	2013.56	11445.6	0.296581	91.5	86.734	0.0664644	30.2	417.5	27.4146	2	51.64	15.5298	4.39897	10.3095	18.53	1.52	352.39	133.83	2
15	2018	1	Massinissa	Cultivar	6.1338	16.2827	119	182.143	2377.97	11236.3	0.366294	85.3	91.5141	0.0653498	28.8	340	33.0481	2	53.08	12.3869	3.89575	9.86	21.46	1.55	412.32	155.4	2
6	2018	1	MBB	Landrace	3.4788		129	160.714	1891.77	2022.6		120.9	92.9997	0.071457	30.8		9.5181	2	52	9.77442		0	20.2	1.31	294.95	135.18	1
30	2018	1	Megress	Cultivar	6.21603	18.3487	119	192.857	1997.83	11005.2	0.324601	85.7778	77.4459	0.0709519	28.6	442.5	24.8704	2	54.12	13.3897	4.959	10.915	17.04	1.64	338.25	141.75	2
18	2018	1	Mexicali 75	Cultivar	6.8309	15.438	122	192.857	2580.15	10975.9	0.393024	83.8	91.9794	0.06064	31	345	31.8143	4	55.28	11.4775	3.9605	10.028	21.23	1.7	417	156.46	3
1	2018	1	Montpellier	Landrace	5.29073	13.5945	121	178.571	2508.44	7347.53	0.286236	92.8	91.524	0.0741815	24.8	262.5	27.9906	4	52.96	9.95292	3.64163	7.53288	21.93	1.6	300.71	186.08	4
3	2018	1	Ofanto	Cultivar	5.57033	15.8133	118	171.429	2349.86	6593.52	0.228494	77	93.4004	0.0757066	29.6	285	23.1352	2	54.8	10.4206	5.39275	9.006	20.29	1.62	422.82	177.9	1
12	2018	1	Oued El Berd	Cultivar	3.61943	9.44963	123	225	1421.65	4573.95	0.249375	77.9	95.2284	0.0692646	30.2	232.5	19.6729	3	51.52	6.2145	3.23513	5.59163	16.3	1.22	235.75	98.47	2
28	2018	1	OZ368	Landrace	3.61063	13.956	127	207.143	2278.46	7083.63	0.289517	112.75	80.2564	0.0622263	28.6	245	28.9128	4	57.04	11.5032	2.45282	6.49332	20.3	1.57	332.32	141.78	3
22	2018	1	Polonicum	Cultivar	5.46443	13.1331	116	285.714	2518.96	9724.63	0.376452	88.4286	85.9021	0.0694293	28.6	282.5	34.4235	5	50.84	11.477	1.65614	6.60014	24.64	1.43	421.28	174.89	4
7	2018	1	Sahel 77	Cultivar	4.4231	7.538	125	332.143	1859.03	5757.51	0.366012	83.1	98.4356	0.0690093	31.8	200	28.7876	3	47.92	5.83033	1.70767	4.46667	21.67	1.2	277.49	128.29	2
27	2018	1	Simeto	Cultivar	4.89063	15.6934	119	185.714	2178.51	8245.38	0.295697	78.125		0.0738668	27.8	247.5	33.3147	3	56.28	12.9032	2.79027	7.43077	19.66	1.55	397.55	160.92	1
29	2018	1	Sitifis	Cultivar	5.46747	13.0637	120	225	1769.89	8905	0.34192	87	99.794	0.0683431	28.6	305	29.1967	2	50.16	10.1861	2.87765	7.3444	17.94	1.38	293.23	120.96	2
10	2018	1	Vitron	Cultivar	4.3154	10.5047	123	203.571	1601.93	6368.29	0.352341	76.8	95.9156	0.0719009	29.6	255	24.9737	3	58.12	7.29125	3.2135	6.91475	18.83	1.19	245.38	115.18	2
25	2018	1	Waha	Cultivar	5.60857	12.7229	122	185.714	2014.53	9282.66	0.375309	89.1429	88.5048	0.0689044	28.6	302.5	30.6865	2	51.44	10.6583	2.06453	6.83953	20.72	1.36	350.98	138.81	1
19	2018	1	ZB/Fg	Cultivar	4.7216	19.6009	123	182.143	2633.51	4038.72	0.108299	86.5	92.507	0.0612718	30.2	375	10.7699	3	52.56	12.2924	7.3085	9.43125	21.05	1.75	424.8	161.36	2
51	2018	2	Acsad 65	Cultivar	5.61133	13.7667	123	132.143	1797.2	9913.9	0.411917	93.4286	94.2201	0.0715613	27.2	310	31.9803	3	57.2	10.7347	3.03198	8.70273	19.64	1.28	323	128.61	2
60	2018	2	Altar 84	Cultivar	5.48857		116	142.857	1784.98	13967.8		87.0625	88.4099	0.0812168	29.6	170		2	54.76	14.4504		5.13117	19.66	1.27	370.6	144.97	2
43	2018	2	Bidi 17	Landrace	5.6947	17.9665	129	207.143	2426.43	7997.02	0.239112	121.833	82.3926	0.0751063	30.2	335	23.8717	4	53.72	13.318	4.6485	8.9445	23.57	1.44	436.09	182.24	3
56	2018	2	Bousselem	Cultivar	6.59103	15.2218	124	185.714	2054.84	10658.7	0.378962	85.5556	87.5952	0.0748624	27.6	350	30.4535	2	54.12	11.9522	3.26967	9.03817	22.11	1.3	366.37	153.83	2
58	2018	2	Boutaleb	Cultivar	4.7145	17.4892	125	171.429	1997.22	7389.94	0.289864	102.5	85.2669	0.0789649	29	357.5	20.6712	1	68.6	12.0602	5.42908	10.4986	21.49	1.3	383.23	157.71	1
54	2018	2	Capeiti	Cultivar	5.70217	13.4545	115	139.286	2045.49	9018.59	0.360622	107.444	91.054	0.0600248	30.6	305	29.5691	3	53.8	10.5077	2.94685	7.79885	22.18	1.29	364.42	122.78	2
34	2018	2	Cirta	Cultivar	6.3518	15.5956	121	182.143	1925.08	9563.48	0.326968	89.5	88.5862	0.0672857	29.4	317.5	30.1212	3	53.32	12.1753	3.42033	8.51958	19.5444	1.37778	374.46	129.53	3
57	2018	2	Gloire de Montgolfier	Landrace	4.71723	16.9365	129	178.571	2878.94	7359.81	0.204588	141.1	83.707	0.0652081	29	290	25.3787	1	47.08	12.47	4.4665	7.9315	23.55	1.71	511.79	187.73	1
47	2018	2	GTA Dur	Cultivar	6.8152	16.9855	121	225	2198.49	11936.7	0.38708	86	98.1594	0.0698389	31.4	370	32.2614	2	55.08	13.0584	3.92708	10.5018	20.92	1.47	396.96	153.54	2
36	2018	2	Guemgoum R'khem	Landrace	4.2543	17.6012	129	132.143	2217.68	6088.11	0.233961	126.111	89.2557	0.0678232	26	302.5	20.126	4	67.64	13.5023	4.09891	8.21691	23.68	1.31	344.98	150.41	3
48	2018	2	Hedba 3	Landrace	6.06157	21.7367	128	225	2550.93	12182.3	0.295468	132.778	91.4368	0.063071	28.6	397.5	30.6473	2	52.72	16.2342	5.5025	11.925	24.44	1.46	361.33	160.89	3
32	2018	2	INRAT 69	Cultivar	5.22823	15.5279	116	171.429	2228.72	11053.2	0.36531	99.6667	83.6055	0.0745721	29.4	375	29.4752	4	51.32	12.2342	3.29375	8.96625	23.44	1.33	396.07	166.2	3
31	2018	2	Korifla	Cultivar	6.50403	16.7421	122	171.429	1617.08	10733	0.327976	87.625	85.5153	0.070318	27.8	360	29.8139	3	51.16	12.2947	4.4474	9.9384	18.39	1.23	291.56	113.71	2
55	2018	2	Langlois	Landrace	4.2156	20.0045	130	239.286	2380.8	9605.8	0.247581	143.556	86.4056	0.0649571	28	320	30.0181	4	51.56	16.4741	3.53045	8.4832	22.81	1.46	412.42	154.65	1
35	2018	2	Mansourah	Cultivar	4.48857	24.7994	123	146.429	1990.6			89.625	88.0774	0.0743998	27.6	392.5		2	53.92	15	9.79942	9.79942	18.44	1.51	347.94	148.1	2
59	2018	2	Massinissa	Cultivar	5.668	15.2391	120	178.571	2006.01	10929.2	0.367197	80.6154	87.5333	0.0741771	25.8	317.5	34.4227	2	51.2	11.6347	3.60434	9.20009	20.7	1.35556	394.92	148.8	2
46	2018	2	MBB	Landrace	8.00349	28.121	129		1795.19	15324	0.243475	127.75	93.1425	0.0654247	29.6	375	40.8639	2	44.68	20.3428	7.77825	14.625	20	1.25556	284.31	117.45	2
50	2018	2	Megress	Cultivar	5.91223	18.6042	116	200	1737.34	10248.1	0.318611	82.8182	93.9842	0.0721044	24.2	350	29.2803	3	57.84	13.5242	5.08	11.0075	16.31	1.49	312.52	125.27	1
42	2018	2	Mexicali 75	Cultivar	6.55563	15.9616	129	164.286	1625.37	11018.7	0.376089	120.75	83.0815	0.0671294	26.8	332.5	33.139	4	54.48	12.249	3.71265	9.71565	20.12	1.13	271.58	109.11	3
53	2018	2	Montpellier	Landrace	4.8354	14.1812	125	135.714	2471.27	8349.45	0.289204	107.4	90.9023	0.0711619	31.2	252.5	33.0671	5	49.12	10.7579	3.42325	7.5245	23.84	1.45	448.96	175.86	3
33	2018	2	Ofanto	Cultivar	6.65787	18.0671	118	150	1772.77	11857.2	0.367782	82.1111	82.0276	0.0742625	26.4	472.5	25.0945	2	56.04	12.2851	5.782	12.4268	18.1444	1.36667	307.18	131.65	2
40	2018	2	Oued El Berd	Cultivar	5.38427	15.1163	124	214.286	1617.02	8338.94	0.270751	93.6667	89.153	0.07251	27.2	280	29.7819	2	49.08	11.2607	3.85552	7.94827	18.54	1.22	299.64	117.25	2
37	2018	2	OZ368	Landrace	3.7512	13.2516	129	232.143	2433.09	6112.48	0.252404	124	86.4512	0.072336	29.2	287.5	21.2608	4	54.72	10.7601	2.4915	5.83625	23.8	1.43	409.73	176	3
45	2018	2	Polonicum	Cultivar	6.37343	18.1733	119	214.286	2150.61	13215.7	0.392691	95.25	87.1625	0.0665299	30.6	385	34.3266	5	54	16.1212	2.05217	9.18867	22.9444	1.31111	327.41	143.08	4
38	2018	2	Sahel 77	Cultivar	6.01957		125	160.714	2145.56			88.4444	90.0264	0.0690403	29.8			2					24.4	1.23	360.88	148.13	3
39	2018	2	Simeto	Cultivar	6.71807	17.8269	119	210.714	2096.81	9749.56	0.313922	84.5	89.6418	0.0751857	25.8	312.5	31.1986	3	57.4	13.3846	4.44229	10.0385	19.17	1.53	400.14	157.65	2
41	2018	2	Sitifis	Cultivar	6.72393	18.302	124	214.286	1838.54	11808.8	0.321836	91.6667	92.8984	0.0778007	25.2	400	29.5221	2	49.88	13.1616	5.14042	11.0307	19.05	1.35	356.06	143.04	1
44	2018	2	Vitron	Cultivar	6.19877	18.0382	125	150	2006.19	11587.5	0.336869	86.4286	89.7895	0.0695997	25.6	452.5	25.6078	3	52.44	13.2245	4.81367	10.8902	22.45	1.25	337.65	139.63	2
52	2018	2	Waha	Cultivar	5.82433	15.5125	121	142.857	1789.04	11884.4	0.387962	85.7778	88.1012	0.0734473	28	355	33.4771	2	50.64	12.2439	3.26855	9.2868	20.02	1.25	326.39	131.4	1
49	2018	2	ZB/Fg	Cultivar	5.44783	16.3452	124	171.429	1662.57	13097.1	0.401923	82.6	98.1977	0.0770794	26.6	417.5	31.3703	3	50.16	12.3102	4.035	10.6045	19.38	1.2	301.37	128.15	3
81	2018	3	Acsad 65	Cultivar	5.24547	15.5398	119	157.143	2006.82	10908	0.389435	85.8	98.6829	0.0739081	26.2	290	37.6137	2	55.48	12.8577	2.68208	8.73383	20.49	1.37	402.88	148.32	2
66	2018	3	Altar 84	Cultivar	0.840967	16.4458	119	146.429	1976.56		0.383518	85.6	90.1338	0.0712856	25.8	352.5		2		12.7726	3.6732	9.98045	19.2	1.44	368.43	140.9	1
79	2018	3	Bidi 17	Landrace	4.51857	12.8647	123	146.429	2287.92	7246.38	0.279836	125	91.5476	0.0677645	24.2	200	36.2319	4	49.68	10.55	2.31467	5.91467	22.38	1.43	360.13	155.04	2
72	2018	3	Bousselem	Cultivar	6.46777	15.855	124	167.857	1938.59	10204.3	0.384358	88.4	93.0372	0.0720677	25.2	352.5	28.9483	3	59.72	12.5937	3.26135	9.35535	20.7	1.31	332.6	139.71	2
87	2018	3	Boutaleb	Cultivar	4.7464	16.3736	121	139.286		9627.48	0.33186	112.667	84.6442		31.2	330	29.1742	3	56.44	12.8138	3.55985	8.9936					2
75	2018	3	Capeiti	Cultivar	5.3271	17.8088	116		1955.11		0.367641	98.8	84.1603	0.0767425	28.2	350		2		13.8176	3.99125	10.5385	21.2	1.29	318.06	150.04	2
67	2018	3	Cirta	Cultivar	6.4959	12.9326	120	146.429	1830.42		0.342546	86.2	89.9596	0.0698967	27.4	247.5		4		10.2733	2.65923	7.08923	18.42	1.39	321.65	127.94	2
63	2018	3	Gloire de Montgolfier	Landrace	4.7404	18.9936	128	185.714	2610.24	10536.1	0.25739	125.286	82.2529	0.0620594	26.8	392.5	26.8436	1	46.4	15.1204	3.87316	8.76191	22.82	1.6	383.37	161.99	1
90	2018	3	GTA Dur	Cultivar	6.98433	15.3347	121	257.143	2298.27	8667.57	0.323988	88.1667	90.7216	0.0660409	34.8	307.5	28.1872	2	57.32	12.5939	2.74077	7.70902	20.6667	1.55556	350.68	151.78	2
85	2018	3	Guemgoum R'khem	Landrace	2.8759	14.1075	125	128.571	1890.02		0.214779	128.4	83.9779	0.0732216	32.4	225		4		11.49	2.6175	5.6475	21.15	1.25	315.7	138.39	2
84	2018	3	Hedba 3	Landrace	4.91603	17.1423	127	225	2277.09	7594.26	0.216191	135	91.6266	0.0636689	31.4	302.5	25.105	4	48.8	13.5147	3.62761	7.33361	22.59	1.41	365.91	144.98	2
78	2018	3	INRAT 69	Cultivar	4.64913	17.1281	116	189.286	2261.71	10047.6	0.311141	100.8	90.1469	0.0741782	31.2	412.5	24.3578	3	53.04	12.5986	4.5295	9.85875	21.97	1.44	381.25	167.77	3
61	2018	3	Korifla	Cultivar	5.5219		119	196.429	1487.06	10307.7		83.2	88.2022	0.072196	28.6	257.5	40.03	2	52.32	10.3273		5.27102	17.05	1.22	235.93	107.36	2
74	2018	3	Langlois	Landrace	4.09183	15.9498	129	142.857	2239.9	7718.73	0.244486	131.6	93.8441	0.0651995	28.6	255	30.2695	2	50.52	12.0752	3.8746	7.7741	21.46	1.46	382.74	146.04	2
76	2018	3	Mansourah	Cultivar	4.22503	13.9364	123	167.857	1703.2	7083.03	0.279735	86.6	91.2088	0.0733678	38.6	275	25.7565	2	55.04	10.7005	3.23592	7.13442	17.39	1.37	279.72	124.96	2
69	2018	3	Massinissa	Cultivar	6.15003	18.3765	119	160.714	1844.44	11146.8	0.337986	75.2	94.5717	0.0857278	28.2	305	36.5469	2	55.72	13.6797	4.69682	10.9078	20	1.29	343.79	158.12	2
71	2018	3	MBB	Landrace	4.1101	17.6753	127	142.857	1774.08	8264.74	0.22837	130	94.5806	0.0691231	25.4	387.5	21.3284	2	48.84	13.1545	4.52079	8.55729	19.54	1.27	292.86	122.63	1
88	2018	3	Megress	Cultivar	6.96273	14.7277	118	171.429	1854.71	10118.7	0.360291	88	85.2824	0.0769178	30.2	327.5	30.8968	2	52.44	12.1063	2.62143	7.92768	16.42	1.58	351.39	142.66	2
70	2018	3	Mexicali 75	Cultivar	6.56753	17.167	120	221.429	2130.76	10718.2	0.354881	87	89.2167	0.0695855	27.4	392.5	27.3076	4	56.84	12.9692	4.19779	10.29	19.87	1.5	372.96	148.27	2
86	2018	3	Montpellier	Landrace	6.2936	18.9868	123	189.286	2403.96	11429.2	0.30483	106	82.9918	0.0626923	29.4	332.5	34.3736	4	50.64	15.4457	3.54109	9.32884	24.2111	1.38889	365.53	150.71	3
65	2018	3	Ofanto	Cultivar	6.10017	15.0009	118	135.714	1944.17	9787.53	0.380776	78	89.9573	0.076017	25.6	265	36.9341	2	58.36	12.596	2.40495	8.11695	18.5	1.47	360.28	147.79	2
73	2018	3	Oued El Berd	Cultivar	4.70673	19.0403	124	135.714	1447.09	8794.1	0.243497	87	91.8112	0.0654623	29	462.5	19.0143	2	52.72	12.5796	6.46067	11.0969	17.01	1.19	299.73	94.73	1
82	2018	3	OZ368	Landrace	4.90363	16.0225	127	200	2309.98	6760.85	0.225495	120.6	85.5505	0.0673727	29.8	290	23.3133	3	53.44	12.6707	3.35183	6.96483	23.08	1.4	390.53	155.63	3
77	2018	3	Polonicum	Cultivar	4.6732	15.0022	119	153.571	2311.99	8484.42	0.292274	96.2	89.4164	0.0714148	28.6	315	26.9347	5	51.68	10.9134	4.08875	8.4735	23.1	1.4	414.56	165.11	4
62	2018	3	Sahel 77	Cultivar	5.07077	13.8033	125	207.143		10851.1	0.361617	86.4	91.6168		27.8	337.5	32.1514	2	46	11.2112	2.59213	7.58363	24.7778		321.54	140.63	2
89	2018	3	Simeto	Cultivar	5.65817	17.3184	117	157.143	1911.71	10032.7	0.318852	81.5	81.7196	0.0814923	33.8	322.5	31.1092	3	55.04	14.7843	2.53405	8.05605	18.7	1.43	353.96	155.79	2
68	2018	3	Sitifis	Cultivar	6.18003	21.1702	123	214.286	1570.21	13028.2	0.309917	92.2	86.7424	0.0680739	24	432.5	30.123	3	50.36	14.563	6.60718	13.1682	16.15	1.36	263.94	106.89	2
64	2018	3	Vitron	Cultivar	7.2511	19.1268	118	228.571	1942.78	6440.86	0.187904	86.8333	89.918	0.0732457	27	360	17.8913	2	55.8	12.552	6.5748	10.1688	20.13	1.35	324.23	142.3	2
83	2018	3	Waha	Cultivar	4.7635	16.7779	116	207.143	1488.25	7158.18	0.234654	87	92.6247	0.0644043	30.8	397.5	18.008	3	55	12.0627	4.71525	8.65225	17.1889	1.21111	211.21	95.85	2
80	2018	3	ZB/Fg	Cultivar	5.31483	14.6138	123	157.143	1963.69	9940.7	0.355624	88	91.4706	0.0677908	34.4	330	30.1233	3	52.28	12.1427	2.4711	7.6681	21.8	1.26	315.83	133.12	3
4	2017	1	Acsad 65	Cultivar	1.7494	3.29857	107	271.429	1361.56	4742.75	0.464703	70	75.7196	0.0828244	27	267.857	17.7063	3	32.32	2.36393	0.934643	2.4675	15.74	1.21	264.96	112.77	2
5	2017	1	Altar 84	Cultivar	1.79973	3.40964	106	189.286	1132.88	5190.68	0.502985	67	80.8544	0.0814031	26	246.429	21.0636	2	33.04	2.42357	0.986071	2.70107	14.81	1.07	213.47	92.22	1
9	2017	1	Bidi 17	Landrace	1.45453	3.10071	114	146.429	2029.93	3632.57	0.396913	72	83.8945	0.0824955	25	171.429	21.19	5	33.88	2.28964	0.811071	2.04179	21.19	1.34	423.58	167.46	4
2	2017	1	Bousselem	Cultivar	1.43117	3.40893	108	203.571	1350.39	4287.53	0.444735	64	75.0787	0.0998527	26	232.143	18.4694	3	35.36	2.36	1.04893	2.565	17.82	1.06	239.01	134.84	2
24	2017	1	Boutaleb	Cultivar	2.2292	4.8925	109	221.429	1268.3	5697.85	0.415067	67	79.159	0.0890796	26	278.571	20.4538	2	35.64	3.565	1.3275	3.35821	15.7	1.13	259.93	112.98	2
23	2017	1	Capeiti	Cultivar	1.81183	4.04036	107	217.857	1293.11	5062.14	0.456554	66	81.3038	0.0808902	25	278.571	18.1718	3	36.44	3.11143	0.928929	2.77357	15.2	1.19	236.32	104.6	2
20	2017	1	Cirta	Cultivar	2.25473	3.13107	106	185.714	1493.48	3514.42	0.393749	67	83.5035	0.0820364	26	200	17.5721	4	35.08	2.26821	0.862857	2.09571	16.58	1.26	270.05	122.52	3
8	2017	1	Gloire de Montgolfier	Landrace	1.63283	4.3525	115	192.857	1777.53	4132.19	0.311397	74	86.5237	0.0721564	27	203.571	20.2985	2	32.8	3.25857	1.09393	2.44929	17.76	1.4	288.21	128.26	1
16	2017	1	GTA Dur	Cultivar	2.32363	4.3225	108	192.857	1436.09	6220.03	0.497315	58	78.2326	0.0806913	31	257.143	24.189	4	34.56	3.10179	1.22071	3.37036	16.2	1.24	266.35	115.88	4
11	2017	1	Guemgoum R'khem	Landrace	1.10787	2.94429	118	121.429	1808.78	3525.69	0.430131	82	83.5511	0.076842	26	214.286	16.4532	4	35.92	2.1225	0.821786	2.08821	20.91	1.21	347.66	138.99	3
14	2017	1	Hedba 3	Landrace	2.24313	4.24214	114	153.571	1940.27	7180.5	0.513891	89	85.0163	0.071686	26	289.286	24.8215	3	30.36	3.08429	1.15786	3.33786	21.54	1.26	386.15	139.09	2
17	2017	1	INRAT 69	Cultivar	1.49853	4.01429	106	189.286	1715.63	6355.82	0.512989	52	84.3404	0.0803028	25	235.714	26.9641	4	32.4	2.89107	1.12321	3.1825	17.02	1.41	292.92	137.77	3
13	2017	1	Korifla	Cultivar	2.16317	4.36714	107	232.143	1142.57	5897.62	0.425662	58	78.6701	0.0831986	24	264.286	22.3153	2	31.52	3.12643	1.24071	3.09964	13.66	1.17	215.27	95.06	1
26	2017	1	Langlois	Landrace	1.8952	5.19357	117	207.143	1485.2	4593.24	0.320864	95	79.6135	0.0788309	26	239.286	19.1956	3	36.28	4.0325	1.16107	2.8275	16.62	1.25	269.04	117.08	3
21	2017	1	Mansourah	Cultivar	1.9251	4.30714	110	217.857	1338.29	5068.33	0.461277	57	76.3826	0.08738	27	242.857	20.8696	2	39.2	3.16571	1.14143	3.12821	15.6	1.2	238.45	116.94	2
15	2017	1	Massinissa	Cultivar	2.41267	4.32679	106	225	1163.29	4903.4	0.387123	56	79.5129	0.0890323	30	217.857	22.5074	2	34.16	3.28429	1.0425	2.7175	14.4	1.13	232.41	103.57	2
6	2017	1	MBB	Landrace	1.4296	4.51607	116	310.714	1119.11	4122.08	0.292448	60	88.219	0.0841471	26	250	16.4883	2	32.04	3.43036	1.08571	2.40643	14.63	1.07	202.7	94.17	1
30	2017	1	Megress	Cultivar	2.32227	3.51214	107	150	1635.23	4366.05	0.506203	56	79.7598	0.0957784	24	210.714	20.7203	2	40.72	2.485	1.02714	2.805	17.87	1.28	223.45	156.62	2
18	2017	1	Mexicali 75	Cultivar	2.2002	4.25964	108	196.429	1435.83	2706.62	0.194181	58	81.8911	0.079668	26	292.857	9.24211	4	30.56	3.26536	0.994286	1.82143	15.94	1.26	240.55	114.39	3
1	2017	1	Montpellier	Landrace	1.51613	3.97107	107	210.714	1920.91	4171.8	0.341218	58	82.7098	0.0858029	24	214.286	19.4684	4	32.48	2.91643	1.05464	2.40964	18.79	1.43	358.33	164.82	4
3	2017	1	Ofanto	Cultivar	1.27627	2.86893	106	217.857	1248.09	3638.17	0.447902	56	74.4456	0.0914039	29	228.571	15.917	2	35.32	2.00357	0.865357	2.15036	14.31	1.22	204.38	114.08	1
12	2017	1	Oued El Berd	Cultivar	1.80733	3.75179	108	225	1257.52	2733.55	0.33603	64	79.391	0.0761258	31	153.571	17.7999	3	46.12	2.89	0.861786	2.1225	15.43	1.14	232.3	95.73	2
28	2017	1	OZ368	Landrace	1.9833	4.92286	114	189.286	1656.7	5084.91	0.421431	75	83.4203	0.0817045	28	228.571	22.2465	4	40.8	3.71643	1.20643	3.28107	17.69	1.31	278.6	135.36	3
22	2017	1	Polonicum	Cultivar	2.0411	4.90071	115	200	2197.51	5474.68	0.40395	82	81.4959	0.0833263	26	232.143	23.5832	5	36.16	3.64357	1.25714	3.23679	22.21	1.384	435.14	183.11	4
7	2017	1	Sahel 77	Cultivar	1.5262	3.54607	109	242.857	1601.94	4153.58	0.362171	62	81.411	0.0808457	27	239.286	17.3582	3	30.92	2.47607	1.07	2.35429	19.83	1.13	284.57	129.51	2
27	2017	1	Simeto	Cultivar	1.18727	3.30321	106	167.857	1496.82	3794.21	0.478754	59	81.7746	0.0878595	27	221.429	17.1352	3	41.68	2.43714	0.866071	2.4475	16.75	1.25	287.91	131.51	1
29	2017	1	Sitifis	Cultivar	1.98287	3.17571	108	160.714	1074.92	4323.07	0.426901	64	83.4527	0.0947509	26	185.714	23.2781	2	31.36	2.20179	0.973929	2.32964	14.32	1.05	225.49	101.85	2
10	2017	1	Vitron	Cultivar	1.86543	4.085	108	196.429	1227.73	5024.58	0.461007	69	81.4793	0.0756272	26	325	15.4603	3	37.48	2.95571	1.12929	3.0125	16.05	1.07	199.21	92.85	2
25	2017	1	Waha	Cultivar	1.93923	4.12321	107	203.571	1379.26	5745.39	0.431962	60	82.7701	0.0757582	27	250	22.9816	2	31	2.92	1.20321	2.98429	16.35	1.18	243.81	104.49	1
19	2017	1	ZB/Fg	Cultivar	1.94137	3.73214	108	196.429	1134.71	4643.88	0.435502	56	82.8704	0.0913801	29	239.286	19.4072	3	35	2.67	1.06214	2.6875	15.41	1.03	194.64	103.69	2
51	2017	2	Acsad 65	Cultivar	1.38233	3.53857	107	200	1368.4	4626.43	0.431974	60	78.5447	0.0812771	31	217.857	21.2361	3	33.04	2.61179	0.926786	2.45536	16.36	1.17	225.73	111.22	2
60	2017	2	Altar 84	Cultivar	1.8197	3.29607	106	192.857	1419.37	4761.58	0.531043	70	81.5068		27	210.714	22.5973	2	36.76	2.40536	0.890714	2.64107	17.57	1.13	240.45		2
43	2017	2	Bidi 17	Landrace	2.04913	4.41357	114	160.714	1862.8	4755.9	0.427577	74	88.1528	0.0863216	24	192.857	24.6602	4	39.68	3.365	1.04857	2.93571	19.74	1.32	364.47	160.8	3
56	2017	2	Bousselem	Cultivar	1.57213	2.81357	108	207.143	1621.99	3565.27	0.440975	60	81.2403	0.0883666	28	185.714	19.1976	2	34.8	2.08714	0.726429	1.96714	20.44	1.11	321.56	143.33	2
58	2017	2	Boutaleb	Cultivar	1.5738	3.61321	109	210.714	1439.48	4944.05	0.447168	66	79.0423	0.0932003	24	239.286	20.6617	1	32.68	2.61393	0.999286	2.615	18.14	1.11	317.21	134.16	1
54	2017	2	Capeiti	Cultivar	1.42893	2.80393	107	214.286	1516	2905.31	0.341103	56	81.0466	0.0760025	29	200	14.5266	3	32.92	2.14286	0.661071	1.6175	16.83	1.26	258.35	115.22	2
34	2017	2	Cirta	Cultivar	2.16393	3.58821	106	150	1670.12	4867.42	0.520354	62	87.6883	0.0805271	26	192.857	25.2385	3	38.36	2.50893	1.07929	2.94643	18.84	1.24	307.75	134.49	3
57	2017	2	Gloire de Montgolfier	Landrace	1.2779	3.13143	115	203.571	1717.18	3317.38	0.358919	74	83.7354	0.0804286	24	182.143	18.2131	1	33.88	2.345	0.786429	1.91036	18.62	1.29	295.31	138.11	1
47	2017	2	GTA Dur	Cultivar	2.07197	4.86893	108	200	1698.16	7409.72	0.547862	64	74.6718	0.0912576	27	257.143	28.8156	2	36	3.59179	1.27714	3.94464	17.86	1.33	329.28	154.97	2
36	2017	2	Guemgoum R'khem	Landrace	1.61793	5.48571	118	146.429	1947.21	4127.61	0.380729	85	80.6959	0.083612	25	189.286	21.8062	4	50.6	4.22536	1.26036	3.34893	21.79	1.25	349.53	162.81	3
48	2017	2	Hedba 3	Landrace	1.6754	3.0675	114	185.714	2171.67	2810.81	0.299453	83	79.5102	0.0757529	24	164.286	17.1093	2	32.68	2.31607	0.751429	1.67	22.84	1.33	410.12	164.51	3
32	2017	2	INRAT 69	Cultivar	0.834733	3.26	106	160.714	1337.65	2077.35	0.202892	65	82.2742	0.0897171	25	200	10.3868	4	31.84	2.4675	0.7925	1.45393	17.01	1.1	272.51	120.01	3
31	2017	2	Korifla	Cultivar	1.8416	3.36429	107	135.714	1341.3	5928.91	0.590021	64	81.5055	0.084985	29	200	29.6446	3	33.48	2.495	0.869286	2.85429	17.7	1.06	274	113.99	2
55	2017	2	Langlois	Landrace	1.4222	3.45429	117	207.143	1633.25	3884.32	0.359388	80	79.8844	0.0825163	25	203.571	19.0809	4	31.96	2.75464	0.699643	1.94107	17.71	1.29	396.22	134.77	1
35	2017	2	Mansourah	Cultivar	1.86853	3.15393	110	178.571	1816.73	3805.72	0.437776	58	86.3786	0.0848281	28	214.286	17.76	2	36.28	2.31464	0.839286	2.22	21.72	1.17	370.67	154.11	2
59	2017	2	Massinissa	Cultivar	1.4269	3.17929	106	185.714	1308.79	4838.41	0.518647	57	77.9302	0.0775679	26	171.429	28.224	2	34.08	2.2925	0.886786	2.53571	15.13	1.21	196.71	101.52	2
46	2017	2	MBB	Landrace	1.67957	5.19179	116	167.857	1419.78	5144.32	0.357502	81	80.2332	0.0832807	25	242.857	21.1825	2	36.08	3.94071	1.25107	3.10714	18.22	1.09	252.73	118.24	2
50	2017	2	Megress	Cultivar
42	2017	2	Mexicali 75	Cultivar	2.37557	5.1475	108	250	1715.27	7364.51	0.491015	67	82.1594	0.0778593	24	289.286	25.4576	4	34.32	3.73964	1.40786	3.93536	18.04	1.33	327.06	133.55	3
53	2017	2	Montpellier	Landrace	1.2279	3.30357	107	210.714	1654.52	3425.21	0.286162	58	84.0203	0.0907271	25	203.571	16.8256	5	27.6	2.38143	0.922143	1.8675	18.97	1.22	359.66	150.11	3
33	2017	2	Ofanto	Cultivar	1.72967	3.5025	106	185.714	1186.78	3129.4	0.326298	52	79.4388	0.0876318	27	196.429	15.9315	2	36.52	2.66607	0.836429	1.97929	15.23	1.09	259.79	104	2
40	2017	2	Oued El Berd	Cultivar	2.0855	2.98036	108	139.286	1357.31	3604.54	0.404434	64	87.1503	0.0813595	28	178.571	20.1854	2	33.44	2.08821	0.892143	2.0975	17.26	1.1	252.33	110.43	2
37	2017	2	OZ368	Landrace	1.93527	4.44786	114	192.857	2326	4426.1	0.390878	76	92.1412	0.0717498	24	235.714	18.7774	4	39.28	3.28036	1.1675	2.90607	23.24	1.4	442.62	166.89	3
45	2017	2	Polonicum	Cultivar	1.92083	3.95821	115	171.429	2240.53	4099.19	0.400162	74	85.9252	0.0819406	25	185.714	22.0726	5	38.64	2.95357	1.00464	2.58857	21.32	1.47	442.26	183.59	4
38	2017	2	Sahel 77	Cultivar	1.90863	3.66821	109	192.857	1769.89	4675.72	0.396164	65	82.0203	0.0768408	26	260.714	17.9343	2	31.08	2.62286	1.04536	2.49857	21.16	1.17	331.1	136	3
39	2017	2	Simeto	Cultivar	1.90297	4.08107	106	160.714	1739.31	4547.68	0.472477	64	80.7569	0.0987231	26	210.714	21.5822	3	42.4	3.04214	1.03893	2.96714	18.86	1.29	369.52	171.71	2
41	2017	2	Sitifis	Cultivar	2.5325	4.22821	108	207.143	1221.19	5719.7	0.446406	66	78.9855	0.085392	27	242.857	23.5517	2	33	3.02893	1.19929	3.08679	14.6	1.17	229.59	104.28	1
44	2017	2	Vitron	Cultivar	2.34947	4.46071	108	192.857	1594.17	4798.77	0.423859	67	84.9657	0.0888676	25	271.429	17.6797	3	39.4	3.20321	1.2575	3.14821	19.91	1.12	297.02	141.67	2
52	2017	2	Waha	Cultivar	1.61697	0.838214	107	221.429	1161.5	3570.16		58	83.5879	0.0986312	25	207.143	17.2353	2	28.2	0	0.838214	1.845	14.77	1.1	223.63	114.56	1
49	2017	2	ZB/Fg	Cultivar	1.33677	3.80857	108	200	1452.65	4091.04	0.366935	58	75.3512	0.0791658	27	220.357	18.5655	3	34.16	2.80643	1.00214	2.39964	17.22	1.18	252.89	115	3
81	2017	3	Acsad 65	Cultivar	1.80217	3.62143	107	275	1090.47	4746.35	0.43146	58	79.3008	0.0754907	24	300	15.8212	2	32.92	2.6825	0.938929	2.50143	14.39	1.06	172.25	82.32	2
66	2017	3	Altar 84	Cultivar	1.4877	3.33107	106	221.429	1173.19	4901.33	0.476145	63	77.7287	0.0704151	27	232.143	21.1134	2	32.36	2.47643	0.854643	2.44071	14.27	1.15	203.48	82.61	1
79	2017	3	Bidi 17	Landrace	2.0276	5.30464	114	264.286	1548.49	5918.31	0.41325	74	79.3603	0.0859996	26	289.286	20.4584	4	37.04	3.9825	1.32214	3.51429	17.61	1.23	276.91	133.17	2
72	2017	3	Bousselem	Cultivar	2.00703	4.45357	108	214.286	1168.95	5920.59	0.482839	65	82.6562	0.0805597	28	260.714	22.7091	3	36.32	3.27679	1.17679	3.32714	15.14	1.08	193.86	94.17	2
87	2017	3	Boutaleb	Cultivar	1.8813	3.1875	109	171.429	1141.56	4447.54	0.476078	56	75.092	0.0878009	28	242.857	18.3134	3	34.12	2.28179	0.905714	2.42321	15.81	1.01	219.75	100.23	2
75	2017	3	Capeiti	Cultivar	1.4873	3.22929	107	250	1062.86	3087.58	0.323933	65	77.29	0.078402	28	228.571	13.5082	2	33.88	2.49786	0.731429	1.7775	14.72	1.01	190.22	83.33	2
67	2017	3	Cirta	Cultivar	1.42673	2.93036	106	207.143	1325.27	3848.45	0.440219	61	72.5778	0.0781125	27	210.714	18.2638	4	33.52	2.13357	0.796786	2.08679	15.71	1.18	230.54	103.52	2
63	2017	3	Gloire de Montgolfier	Landrace	1.87653	4.00643	115	189.286	1643.53	3796.75	0.321448	85	81.4713	0.0798466	26	178.571	21.2618	1	33.92	3.05571	0.950714	2.23857	18.54	1.24	260.35	131.23	1
90	2017	3	GTA Dur	Cultivar	1.58027	3.37714	108	171.429	1278.42	5002.97	0.498942	63	73.8126	0.0901191	28	210.714	23.7429	2	33.68	2.34214	1.035	2.72	15.55	1.15	247.78	115.21	2
85	2017	3	Guemgoum R'khem	Landrace	1.69163	4.75679	118	167.857	1757.76	4384.62	0.417374	75	83.4215	0.0844939	26	232.143	18.8876	4	45.28	3.68714	1.06964	3.055	19.67	1.25	340.38	148.52	2
84	2017	3	Hedba 3	Landrace	1.5376	5.01536	114	232.143	1798.63	5930.41	0.422844	80	82.0584	0.0869717	26	296.429	20.0062	4	35.76	3.765	1.25036	3.37107	19.06	1.32	390.48	156.43	2
78	2017	3	INRAT 69	Cultivar	1.172	4.0625	106	210.714	1614.29	2784.54	0.217143	53	85.9637	0.0770681	23	296.429	9.39364	3	31.68	2.99071	1.07179	1.95393	17.78	1.27	309.63	124.41	3
61	2017	3	Korifla	Cultivar	2.24317	3.39214	107	192.857	1003.96	4136.77	0.432196	61	74.7435	0.0946549	24	175	23.6387	2	35.44	2.44429	0.947857	2.41393	14.33	0.98	182.52	95.03	2
74	2017	3	Langlois	Landrace	1.77327	5.23036	117	253.571	1236.96	5254.32	0.34196	91	85.2302	0.0716028	28	282.143	18.6229	2	34.04	4.05143	1.17893	2.9675	14.54	1.19	195.07	88.57	2
76	2017	3	Mansourah	Cultivar	1.52897	3.36893	110	246.429	1295.18	3285.18	0.337008	56	75.5281	0.0843664	27	232.143	14.1515	2	34.56	2.46893	0.9	2.03536	14.85	1.22	226.09	109.27	2
69	2017	3	Massinissa	Cultivar	2.20459	4.937	106	257.143	1198.29	8194.28	0.574944	55	79.735	0.0897615	31	285	28.7519	2	34.64	3.602	1.335	4.1735	15.52	1.08	220.39	107.56	2
71	2017	3	MBB	Landrace	1.74627	4.52893	116	217.857	1376.14	4526.83	0.331046	69	81.4485	0.0792943	30	260.714	17.3632	2	33.12	3.35821	1.17071	2.67	17.66	1.09	236.45	109.12	1
88	2017	3	Megress	Cultivar	1.74013	2.72571	107	185.714	938.864	2941.06	0.394916	40	79.3798	0.0742706	26	207.143	14.1982	2	36.6	2.03821	0.6875	1.76393	11.52	1.14	165.66	69.73	2
70	2017	3	Mexicali 75	Cultivar	1.75033	4.38821	108	282.143	1273.42	5729.79	0.432978	57	79.6182	0.0836805	27	296.429	19.3294	4	33.16	3.30429	1.08393	2.98393	14.25	1.25	225.94	106.56	2
86	2017	3	Montpellier	Landrace	1.7472	3.74393	107	182.143	1870.61	3945.69	0.307736	57	82.7505	0.079557	28	210.714	18.7253	4	29.2	2.79464	0.949286	2.10143	18.69	1.4	345.16	148.82	3
65	2017	3	Ofanto	Cultivar	1.66797	1.54536	106	235.714	1219.8	3072.16		52	75.697	0.076693	28	150	20.4811	2	33.12	1.01	0.535357	1.55286	13.65	1.25	199.39	93.55	2
73	2017	3	Oued El Berd	Cultivar	1.8838	3.23964	108	296.429	1100.75	3761.54	0.366443	62	77.3629	0.0786552	26	221.429	16.9876	2	31.56	2.25607	0.983571	2.17071	14.39	1.07	185.42	86.58	1
82	2017	3	OZ368	Landrace	2.0136	4.26429	114	217.857	2455.29	3922.99	0.353266	64	76.6849	0.0747733	28	221.429	17.7167	3	38.4	3.26857	0.995714	2.50214	23.05	1.49	472.68	183.59	3
77	2017	3	Polonicum	Cultivar	2.02803	3.71	115	225	1518.05	5042.88	0.495861	72	86.4466	0.0786339	25	232.143	21.7232	5	36.48	2.80357	0.906429	2.74607	16.72	1.27	261.57	119.37	4
62	2017	3	Sahel 77	Cultivar	1.98253	2.95179	109	260.714	1629.97		0.39758	63	76.5006	0.0702994	25			2	31.64	2.29143	0.660357	1.83393	20	1.14	295.69	114.586	2
89	2017	3	Simeto	Cultivar	1.7782	3.32571	106	182.143	1084.7	3349.02	0.446306	57	82.5299	0.0928917	25	192.857	17.3653	3	44.32	2.4525	0.873214	2.3575	13.92	1.09	225.18	100.76	2
68	2017	3	Sitifis	Cultivar	1.78127	3.93464	108	225	1275.9	5527.1	0.43097	56	74.3618	0.0881571	26	250	22.1084	3	30.68	2.85107	1.08357	2.77929	14.51	1.23	254.14	112.48	2
64	2017	3	Vitron	Cultivar	2.03103	3.51536	108	250	1130.34	4469.94	0.481662	58	79.3881	0.0825679	27	253.571	17.6279	2	37.88	2.59464	0.920714	2.61393	16.47	0.96	184.84	93.33	2
83	2017	3	Waha	Cultivar	2.0364	4.53786	107	225	1229.13	7328.3	0.503856	57	78.8596	0.0821884	24	335.714	21.829	3	31.2	3.19286	1.345	3.63143	15.63	1.1	215.86	101.02	2
80	2017	3	ZB/Fg	Cultivar	1.9107	3.32571	108	185.714	1118.46	4259.11	0.443621	59	79.6664	0.081782	30	225	18.9294	3	34.64	2.41786	0.907857	2.38321	14.9	1.05	206.31	91.47	3
						0.167355

## Sheet: AHC_HID4
7.80273	2.17561e+09	1	0			1	13656970
1	2.17561e+09	2	0			2	13656970
1	0	3	0			3	13656970
1	2.17561e+09	4	0			4	13656970
14.6055	2.17561e+09	5	0
14.6055	1.76228e+08	6	0
7.71094	1.76228e+08	7	0
7.71094	6.83597e+06	8	0
2.75	6.83597e+06	9	0
2.75	205656	10	0
2	205656	11	0
2	0	12	0
2	205656	13	0
3.5	205656	14	0
3.5	75312.5	15	0
3	75312.5	16	0
3	0	17	0
3	75312.5	18	0
4	75312.5	19	0
4	0	20	0
4	75312.5	21	0
3.5	75312.5	22	0
3.5	205656	23	0
2.75	205656
2.75	6.83597e+06
12.6719	6.83597e+06					1.875	2.17561e+09
12.6719	1.27398e+06					1	2.17561e+09
9.09375	1.27398e+06					1	0
9.09375	68213.4					1	2.17561e+09
6.3125	68213.4					2.75	2.17561e+09
6.3125	404.528					2.75	1.76228e+08
5	404.528					2	1.76228e+08
5	0					2	0
5	404.528					2	1.76228e+08
7.625	404.528					3.5	1.76228e+08
7.625	151.576					3.5	2.0478e+07
6.5	151.576					3	2.0478e+07
6.5	9.16667					3	0
6	9.16667					3	2.0478e+07
6	0					4	2.0478e+07
6	9.16667					4	0
7	9.16667					4	2.0478e+07
7	0					3.5	2.0478e+07
7	9.16667					3.5	1.76228e+08
6.5	9.16667					2.75	1.76228e+08
6.5	151.576					2.75	2.17561e+09
8.75	151.576					1.875	2.17561e+09
8.75	29.1726
8	29.1726
8	0
8	29.1726
9.5	29.1726
9.5	0.935702
9	0.935702
9	0
9	0.935702
10	0.935702
10	0
10	0.935702
9.5	0.935702
9.5	29.1726
8.75	29.1726
8.75	151.576
7.625	151.576
7.625	404.528
6.3125	404.528
6.3125	68213.4
11.875	68213.4
11.875	17589.2
11	17589.2
11	0
11	17589.2
12.75	17589.2
12.75	1354.59
12	1354.59
12	0
12	1354.59
13.5	1354.59
13.5	371.5
13	371.5
13	0
13	371.5
14	371.5
14	0
14	371.5
13.5	371.5
13.5	1354.59
12.75	1354.59
12.75	17589.2
11.875	17589.2
11.875	68213.4
9.09375	68213.4
9.09375	1.27398e+06
16.25	1.27398e+06
16.25	131019
15	131019
15	0
15	131019
17.5	131019
17.5	49037
16.5	49037
16.5	5876.21
16	5876.21
16	0
16	5876.21
17	5876.21
17	0
17	5876.21
16.5	5876.21
16.5	49037
18.5	49037
18.5	11025
18	11025
18	0
18	11025
19	11025
19	0
19	11025
18.5	11025
18.5	49037
17.5	49037
17.5	131019
16.25	131019
16.25	1.27398e+06
12.6719	1.27398e+06
12.6719	6.83597e+06
7.71094	6.83597e+06
7.71094	1.76228e+08
21.5	1.76228e+08
21.5	2.0478e+07
20.5	2.0478e+07
20.5	1.98742e+06
20	1.98742e+06
20	0
20	1.98742e+06
21	1.98742e+06
21	0
21	1.98742e+06
20.5	1.98742e+06
20.5	2.0478e+07
22.5	2.0478e+07
22.5	5.94116e+06
22	5.94116e+06
22	0
22	5.94116e+06
23	5.94116e+06
23	0
23	5.94116e+06
22.5	5.94116e+06
22.5	2.0478e+07
21.5	2.0478e+07
21.5	1.76228e+08
14.6055	1.76228e+08
14.6055	2.17561e+09
7.80273	2.17561e+09

## Sheet: AHC_HID5
0	1	2	3	4	5	6	7	8	9	10	11	12	13	14	15	16	17	18	19	20	21	22	23	24	25	26	27	28	29
0.0583397	0.0583397	0.0583397	0.0583397	0.0583397	0.0583397	0.0583397	0.0583397	0.0583397	0.0583397	0.0583397	0.0583397	0.0583397	0.0583397	0.0583397	0.0583397	0.0583397	0.0583397	0.0583397	0.0583397	0.0583397	0.0583397	0.0583397	0.0583397	0.0583397	0.0583397	0.0583397	0.0583397	0.0583397	0.0583397
11247.3	11247.3	11247.3	11247.3	11247.3	11247.3	11247.3	11247.3	11247.3	11247.3	11247.3	11247.3	11247.3	11247.3	11247.3	11247.3	11247.3	11247.3	11247.3	11247.3	11247.3	11247.3	11247.3	11247.3	11247.3	11247.3	11247.3	11247.3	11247.3	11247.3
97.7774	93.3351	97.8057	96.7419	99.8497	94.1734	109.692	109.022	106.076	92.2442	110.498	109.087	87.8691	99.8846	111.181	104.336	110.686	104.587	105.347	100.53	104.993	99.015	98.5389	100.335	90.1518	98.9096	108.534	105.944	95.5026	107.538
9466.58	9583.02	7405.44	9796.23	7949.01	10628.8	6489.53	8156.33	10393	5258.25	8502.79	10310.6	9555.49	8601.87	6176.21	11104.1	8537.1	10457.3	10904.3	9042.06	9412.73	7235.66	6652.32	10474.9	8304.3	9342.55	11247.3	8132.23	9441.74	9025.5
1028.77	963.383	892.073	960.088	976.617	1080.09	1085.85	995.787	1084.01	860.02	1130.58	1088.74	844.233	1050.02	1141.23	1127.82	1300.75	1147.84	1112.16	1009.05	1080.86	911.527	903.805	1046.23	727.295	1109.96	1157.57	1017.36	995.725	1074.15
1749.94	1643.98	1846.9	1696.82	2188.08	1778.09	1914.86	2204.74	1970.04	1722.3	2131.55	1961.52	1422.49	1950.15	1928.97	1869.71	2055.08	1792.99	1865.49	2009.99	1825.82	1474.4	1890.76	1935.4	1534.68	1878.48	1738.71	1719.64	1632.19	1885.96

## Sheet: AHC_HID2
7.80273	2.17561e+09	1	0			1	13656970
1	2.17561e+09	2	0			2	13656970
1	0	3	0			3	13656970
1	2.17561e+09	4	0			4	13656970
14.6055	2.17561e+09	5	0
14.6055	1.76228e+08	6	0
7.71094	1.76228e+08	7	0
7.71094	6.83597e+06	8	0
2.75	6.83597e+06	9	0
2.75	205656	10	0
2	205656	11	0
2	0	12	0
2	205656	13	0
3.5	205656	14	0
3.5	75312.5	15	0
3	75312.5	16	0
3	0	17	0
3	75312.5	18	0
4	75312.5	19	0
4	0	20	0
4	75312.5	21	0
3.5	75312.5	22	0
3.5	205656	23	0
2.75	205656
2.75	6.83597e+06
12.6719	6.83597e+06					1.875	2.17561e+09
12.6719	1.27398e+06					1	2.17561e+09
9.09375	1.27398e+06					1	0
9.09375	68213.4					1	2.17561e+09
6.3125	68213.4					2.75	2.17561e+09
6.3125	404.528					2.75	1.76228e+08
5	404.528					2	1.76228e+08
5	0					2	0
5	404.528					2	1.76228e+08
7.625	404.528					3.5	1.76228e+08
7.625	151.576					3.5	2.0478e+07
6.5	151.576					3	2.0478e+07
6.5	9.16667					3	0
6	9.16667					3	2.0478e+07
6	0					4	2.0478e+07
6	9.16667					4	0
7	9.16667					4	2.0478e+07
7	0					3.5	2.0478e+07
7	9.16667					3.5	1.76228e+08
6.5	9.16667					2.75	1.76228e+08
6.5	151.576					2.75	2.17561e+09
8.75	151.576					1.875	2.17561e+09
8.75	29.1726
8	29.1726
8	0
8	29.1726
9.5	29.1726
9.5	0.935702
9	0.935702
9	0
9	0.935702
10	0.935702
10	0
10	0.935702
9.5	0.935702
9.5	29.1726
8.75	29.1726
8.75	151.576
7.625	151.576
7.625	404.528
6.3125	404.528
6.3125	68213.4
11.875	68213.4
11.875	17589.2
11	17589.2
11	0
11	17589.2
12.75	17589.2
12.75	1354.59
12	1354.59
12	0
12	1354.59
13.5	1354.59
13.5	371.5
13	371.5
13	0
13	371.5
14	371.5
14	0
14	371.5
13.5	371.5
13.5	1354.59
12.75	1354.59
12.75	17589.2
11.875	17589.2
11.875	68213.4
9.09375	68213.4
9.09375	1.27398e+06
16.25	1.27398e+06
16.25	131019
15	131019
15	0
15	131019
17.5	131019
17.5	49037
16.5	49037
16.5	5876.21
16	5876.21
16	0
16	5876.21
17	5876.21
17	0
17	5876.21
16.5	5876.21
16.5	49037
18.5	49037
18.5	11025
18	11025
18	0
18	11025
19	11025
19	0
19	11025
18.5	11025
18.5	49037
17.5	49037
17.5	131019
16.25	131019
16.25	1.27398e+06
12.6719	1.27398e+06
12.6719	6.83597e+06
7.71094	6.83597e+06
7.71094	1.76228e+08
21.5	1.76228e+08
21.5	2.0478e+07
20.5	2.0478e+07
20.5	1.98742e+06
20	1.98742e+06
20	0
20	1.98742e+06
21	1.98742e+06
21	0
21	1.98742e+06
20.5	1.98742e+06
20.5	2.0478e+07
22.5	2.0478e+07
22.5	5.94116e+06
22	5.94116e+06
22	0
22	5.94116e+06
23	5.94116e+06
23	0
23	5.94116e+06
22.5	5.94116e+06
22.5	2.0478e+07
21.5	2.0478e+07
21.5	1.76228e+08
14.6055	1.76228e+08
14.6055	2.17561e+09
7.80273	2.17561e+09

## Sheet: AHC_HID3
0	1	2	3	4	5	6	7	8	9	10	11	12	13	14	15	16	17	18	19	20	21	22	23	24	25	26	27	28	29
0.0583397	0.0583397	0.0583397	0.0583397	0.0583397	0.0583397	0.0583397	0.0583397	0.0583397	0.0583397	0.0583397	0.0583397	0.0583397	0.0583397	0.0583397	0.0583397	0.0583397	0.0583397	0.0583397	0.0583397	0.0583397	0.0583397	0.0583397	0.0583397	0.0583397	0.0583397	0.0583397	0.0583397	0.0583397	0.0583397
11247.3	11247.3	11247.3	11247.3	11247.3	11247.3	11247.3	11247.3	11247.3	11247.3	11247.3	11247.3	11247.3	11247.3	11247.3	11247.3	11247.3	11247.3	11247.3	11247.3	11247.3	11247.3	11247.3	11247.3	11247.3	11247.3	11247.3	11247.3	11247.3	11247.3
97.7774	93.3351	97.8057	96.7419	99.8497	94.1734	109.692	109.022	106.076	92.2442	110.498	109.087	87.8691	99.8846	111.181	104.336	110.686	104.587	105.347	100.53	104.993	99.015	98.5389	100.335	90.1518	98.9096	108.534	105.944	95.5026	107.538
9466.58	9583.02	7405.44	9796.23	7949.01	10628.8	6489.53	8156.33	10393	5258.25	8502.79	10310.6	9555.49	8601.87	6176.21	11104.1	8537.1	10457.3	10904.3	9042.06	9412.73	7235.66	6652.32	10474.9	8304.3	9342.55	11247.3	8132.23	9441.74	9025.5
1028.77	963.383	892.073	960.088	976.617	1080.09	1085.85	995.787	1084.01	860.02	1130.58	1088.74	844.233	1050.02	1141.23	1127.82	1300.75	1147.84	1112.16	1009.05	1080.86	911.527	903.805	1046.23	727.295	1109.96	1157.57	1017.36	995.725	1074.15
1749.94	1643.98	1846.9	1696.82	2188.08	1778.09	1914.86	2204.74	1970.04	1722.3	2131.55	1961.52	1422.49	1950.15	1928.97	1869.71	2055.08	1792.99	1865.49	2009.99	1825.82	1474.4	1890.76	1935.4	1534.68	1878.48	1738.71	1719.64	1632.19	1885.96

## Sheet: AHC1_HID
7.80273	2.17561e+09	1	0			1	13656970
1	2.17561e+09	2	0			2	13656970
1	0	3	0			3	13656970
1	2.17561e+09	4	0			4	13656970
14.6055	2.17561e+09	5	0
14.6055	1.76228e+08	6	0
7.71094	1.76228e+08	7	0
7.71094	6.83597e+06	8	0
2.75	6.83597e+06	9	0
2.75	205656	10	0
2	205656	11	0
2	0	12	0
2	205656	13	0
3.5	205656	14	0
3.5	75312.5	15	0
3	75312.5	16	0
3	0	17	0
3	75312.5	18	0
4	75312.5	19	0
4	0	20	0
4	75312.5	21	0
3.5	75312.5	22	0
3.5	205656	23	0
2.75	205656
2.75	6.83597e+06
12.6719	6.83597e+06					1.875	2.17561e+09
12.6719	1.27398e+06					1	2.17561e+09
9.09375	1.27398e+06					1	0
9.09375	68213.4					1	2.17561e+09
6.3125	68213.4					2.75	2.17561e+09
6.3125	404.528					2.75	1.76228e+08
5	404.528					2	1.76228e+08
5	0					2	0
5	404.528					2	1.76228e+08
7.625	404.528					3.5	1.76228e+08
7.625	151.576					3.5	2.0478e+07
6.5	151.576					3	2.0478e+07
6.5	9.16667					3	0
6	9.16667					3	2.0478e+07
6	0					4	2.0478e+07
6	9.16667					4	0
7	9.16667					4	2.0478e+07
7	0					3.5	2.0478e+07
7	9.16667					3.5	1.76228e+08
6.5	9.16667					2.75	1.76228e+08
6.5	151.576					2.75	2.17561e+09
8.75	151.576					1.875	2.17561e+09
8.75	29.1726
8	29.1726
8	0
8	29.1726
9.5	29.1726
9.5	0.935702
9	0.935702
9	0
9	0.935702
10	0.935702
10	0
10	0.935702
9.5	0.935702
9.5	29.1726
8.75	29.1726
8.75	151.576
7.625	151.576
7.625	404.528
6.3125	404.528
6.3125	68213.4
11.875	68213.4
11.875	17589.2
11	17589.2
11	0
11	17589.2
12.75	17589.2
12.75	1354.59
12	1354.59
12	0
12	1354.59
13.5	1354.59
13.5	371.5
13	371.5
13	0
13	371.5
14	371.5
14	0
14	371.5
13.5	371.5
13.5	1354.59
12.75	1354.59
12.75	17589.2
11.875	17589.2
11.875	68213.4
9.09375	68213.4
9.09375	1.27398e+06
16.25	1.27398e+06
16.25	131019
15	131019
15	0
15	131019
17.5	131019
17.5	49037
16.5	49037
16.5	5876.21
16	5876.21
16	0
16	5876.21
17	5876.21
17	0
17	5876.21
16.5	5876.21
16.5	49037
18.5	49037
18.5	11025
18	11025
18	0
18	11025
19	11025
19	0
19	11025
18.5	11025
18.5	49037
17.5	49037
17.5	131019
16.25	131019
16.25	1.27398e+06
12.6719	1.27398e+06
12.6719	6.83597e+06
7.71094	6.83597e+06
7.71094	1.76228e+08
21.5	1.76228e+08
21.5	2.0478e+07
20.5	2.0478e+07
20.5	1.98742e+06
20	1.98742e+06
20	0
20	1.98742e+06
21	1.98742e+06
21	0
21	1.98742e+06
20.5	1.98742e+06
20.5	2.0478e+07
22.5	2.0478e+07
22.5	5.94116e+06
22	5.94116e+06
22	0
22	5.94116e+06
23	5.94116e+06
23	0
23	5.94116e+06
22.5	5.94116e+06
22.5	2.0478e+07
21.5	2.0478e+07
21.5	1.76228e+08
14.6055	1.76228e+08
14.6055	2.17561e+09
7.80273	2.17561e+09

## Sheet: AHC1_HID1
0	1	2	3	4	5	6	7	8	9	10	11	12	13	14	15	16	17	18	19	20	21	22	23	24	25	26	27	28	29
0.0583397	0.0583397	0.0583397	0.0583397	0.0583397	0.0583397	0.0583397	0.0583397	0.0583397	0.0583397	0.0583397	0.0583397	0.0583397	0.0583397	0.0583397	0.0583397	0.0583397	0.0583397	0.0583397	0.0583397	0.0583397	0.0583397	0.0583397	0.0583397	0.0583397	0.0583397	0.0583397	0.0583397	0.0583397	0.0583397
11247.3	11247.3	11247.3	11247.3	11247.3	11247.3	11247.3	11247.3	11247.3	11247.3	11247.3	11247.3	11247.3	11247.3	11247.3	11247.3	11247.3	11247.3	11247.3	11247.3	11247.3	11247.3	11247.3	11247.3	11247.3	11247.3	11247.3	11247.3	11247.3	11247.3
97.7774	93.3351	97.8057	96.7419	99.8497	94.1734	109.692	109.022	106.076	92.2442	110.498	109.087	87.8691	99.8846	111.181	104.336	110.686	104.587	105.347	100.53	104.993	99.015	98.5389	100.335	90.1518	98.9096	108.534	105.944	95.5026	107.538
9466.58	9583.02	7405.44	9796.23	7949.01	10628.8	6489.53	8156.33	10393	5258.25	8502.79	10310.6	9555.49	8601.87	6176.21	11104.1	8537.1	10457.3	10904.3	9042.06	9412.73	7235.66	6652.32	10474.9	8304.3	9342.55	11247.3	8132.23	9441.74	9025.5
1028.77	963.383	892.073	960.088	976.617	1080.09	1085.85	995.787	1084.01	860.02	1130.58	1088.74	844.233	1050.02	1141.23	1127.82	1300.75	1147.84	1112.16	1009.05	1080.86	911.527	903.805	1046.23	727.295	1109.96	1157.57	1017.36	995.725	1074.15
1749.94	1643.98	1846.9	1696.82	2188.08	1778.09	1914.86	2204.74	1970.04	1722.3	2131.55	1961.52	1422.49	1950.15	1928.97	1869.71	2055.08	1792.99	1865.49	2009.99	1825.82	1474.4	1890.76	1935.4	1534.68	1878.48	1738.71	1719.64	1632.19	1885.96

## Sheet: AHC_HID
7.80273	2.17561e+09	1	0			1	13656970
1	2.17561e+09	2	0			2	13656970
1	0	3	0			3	13656970
1	2.17561e+09	4	0			4	13656970
14.6055	2.17561e+09	5	0
14.6055	1.76228e+08	6	0
7.71094	1.76228e+08	7	0
7.71094	6.83597e+06	8	0
2.75	6.83597e+06	9	0
2.75	205656	10	0
2	205656	11	0
2	0	12	0
2	205656	13	0
3.5	205656	14	0
3.5	75312.5	15	0
3	75312.5	16	0
3	0	17	0
3	75312.5	18	0
4	75312.5	19	0
4	0	20	0
4	75312.5	21	0
3.5	75312.5	22	0
3.5	205656	23	0
2.75	205656
2.75	6.83597e+06
12.6719	6.83597e+06					1.875	2.17561e+09
12.6719	1.27398e+06					1	2.17561e+09
9.09375	1.27398e+06					1	0
9.09375	68213.4					1	2.17561e+09
6.3125	68213.4					2.75	2.17561e+09
6.3125	404.528					2.75	1.76228e+08
5	404.528					2	1.76228e+08
5	0					2	0
5	404.528					2	1.76228e+08
7.625	404.528					3.5	1.76228e+08
7.625	151.576					3.5	2.0478e+07
6.5	151.576					3	2.0478e+07
6.5	9.16667					3	0
6	9.16667					3	2.0478e+07
6	0					4	2.0478e+07
6	9.16667					4	0
7	9.16667					4	2.0478e+07
7	0					3.5	2.0478e+07
7	9.16667					3.5	1.76228e+08
6.5	9.16667					2.75	1.76228e+08
6.5	151.576					2.75	2.17561e+09
8.75	151.576					1.875	2.17561e+09
8.75	29.1726
8	29.1726
8	0
8	29.1726
9.5	29.1726
9.5	0.935702
9	0.935702
9	0
9	0.935702
10	0.935702
10	0
10	0.935702
9.5	0.935702
9.5	29.1726
8.75	29.1726
8.75	151.576
7.625	151.576
7.625	404.528
6.3125	404.528
6.3125	68213.4
11.875	68213.4
11.875	17589.2
11	17589.2
11	0
11	17589.2
12.75	17589.2
12.75	1354.59
12	1354.59
12	0
12	1354.59
13.5	1354.59
13.5	371.5
13	371.5
13	0
13	371.5
14	371.5
14	0
14	371.5
13.5	371.5
13.5	1354.59
12.75	1354.59
12.75	17589.2
11.875	17589.2
11.875	68213.4
9.09375	68213.4
9.09375	1.27398e+06
16.25	1.27398e+06
16.25	131019
15	131019
15	0
15	131019
17.5	131019
17.5	49037
16.5	49037
16.5	5876.21
16	5876.21
16	0
16	5876.21
17	5876.21
17	0
17	5876.21
16.5	5876.21
16.5	49037
18.5	49037
18.5	11025
18	11025
18	0
18	11025
19	11025
19	0
19	11025
18.5	11025
18.5	49037
17.5	49037
17.5	131019
16.25	131019
16.25	1.27398e+06
12.6719	1.27398e+06
12.6719	6.83597e+06
7.71094	6.83597e+06
7.71094	1.76228e+08
21.5	1.76228e+08
21.5	2.0478e+07
20.5	2.0478e+07
20.5	1.98742e+06
20	1.98742e+06
20	0
20	1.98742e+06
21	1.98742e+06
21	0
21	1.98742e+06
20.5	1.98742e+06
20.5	2.0478e+07
22.5	2.0478e+07
22.5	5.94116e+06
22	5.94116e+06
22	0
22	5.94116e+06
23	5.94116e+06
23	0
23	5.94116e+06
22.5	5.94116e+06
22.5	2.0478e+07
21.5	2.0478e+07
21.5	1.76228e+08
14.6055	1.76228e+08
14.6055	2.17561e+09
7.80273	2.17561e+09

## Sheet: AHC_HID1
0	1	2	3	4	5	6	7	8	9	10	11	12	13	14	15	16	17	18	19	20	21	22	23	24	25	26	27	28	29
0.0583397	0.0583397	0.0583397	0.0583397	0.0583397	0.0583397	0.0583397	0.0583397	0.0583397	0.0583397	0.0583397	0.0583397	0.0583397	0.0583397	0.0583397	0.0583397	0.0583397	0.0583397	0.0583397	0.0583397	0.0583397	0.0583397	0.0583397	0.0583397	0.0583397	0.0583397	0.0583397	0.0583397	0.0583397	0.0583397
11247.3	11247.3	11247.3	11247.3	11247.3	11247.3	11247.3	11247.3	11247.3	11247.3	11247.3	11247.3	11247.3	11247.3	11247.3	11247.3	11247.3	11247.3	11247.3	11247.3	11247.3	11247.3	11247.3	11247.3	11247.3	11247.3	11247.3	11247.3	11247.3	11247.3
97.7774	93.3351	97.8057	96.7419	99.8497	94.1734	109.692	109.022	106.076	92.2442	110.498	109.087	87.8691	99.8846	111.181	104.336	110.686	104.587	105.347	100.53	104.993	99.015	98.5389	100.335	90.1518	98.9096	108.534	105.944	95.5026	107.538
9466.58	9583.02	7405.44	9796.23	7949.01	10628.8	6489.53	8156.33	10393	5258.25	8502.79	10310.6	9555.49	8601.87	6176.21	11104.1	8537.1	10457.3	10904.3	9042.06	9412.73	7235.66	6652.32	10474.9	8304.3	9342.55	11247.3	8132.23	9441.74	9025.5
1028.77	963.383	892.073	960.088	976.617	1080.09	1085.85	995.787	1084.01	860.02	1130.58	1088.74	844.233	1050.02	1141.23	1127.82	1300.75	1147.84	1112.16	1009.05	1080.86	911.527	903.805	1046.23	727.295	1109.96	1157.57	1017.36	995.725	1074.15
1749.94	1643.98	1846.9	1696.82	2188.08	1778.09	1914.86	2204.74	1970.04	1722.3	2131.55	1961.52	1422.49	1950.15	1928.97	1869.71	2055.08	1792.99	1865.49	2009.99	1825.82	1474.4	1890.76	1935.4	1534.68	1878.48	1738.71	1719.64	1632.19	1885.96

[truncated: 1 more sheets: PCA_HID]
