# Supplementary material for: Enhancing drought resilience in durum wheat: effect of root architecture and genotypic performance in semi-arid rainfed regions
Source: PeerJ. 2025 Mar 27;13:e19096. doi: 10.7717/peerj.19096 (PMC11955194; doi:10.7717/peerj.19096)
Supplement: Data S2 [file peerj-13-19096-s009.xlsx]

## Sheet: Legend
File 2. Mean values of traits measured in rhizoslide, shovelomics and field experiments. See below for trait names and abbreviations. Data are presented in the "Data" sheet
Abbreviation	Seedling traits
TRL	Total root length
Surface	Root surface
Volume	Root volume
Diameter	Root diameter
PRL	Primary root length
SDW	Shoot dry weight
RoA	Root growth opening angle
MRA	Mean root angle
MVA	Maximal root angle
LVA	Least vertical angle
RN	Root number
Abbreviation	Shovelomics traits
RA	Root area
AcH	Area of convex hull
Ff	Filling factor
Depth	Root system depth
Width	Root system width
mW	Maximal root system width
tpSL	Total projected structure length
mFD	Median fractal dimension
NoG	Number of gaps
mGS	Median gap size
mSW	Median structure width
DTH	Days to heading
DTA	Days to anthesis
SRN	Seminal root number
PH	Plant height
RoA	Root growth opening angle
SN	Spike number
TN	Tiller number
NRN	Nodal root number
TRN	Total root number
SDW	Shoot dry weight
StmDW	Stem dry weight
SpkDW	Spike dry weight
RDW	Root dry weigt
RSR	Root to shoot ratio
TPB	Total plant biomass
Abbreviation	Field traits
	Final set of traits
FLA	Flag leaf area
HI	Harvest index
GNA	Grain number per area
AGB	Above ground biomass
DTH	Days to heading
LRN	Leaf rolling index at noon
PEM	Plant emergence
PGY	Plot grain yield
PH	Plant height
RWC	Relative water content
TKW	Thousand kernel weight
CT	Canopy temperature
SLW	Specific leaf weight
SNA	Spike number per area
GNS	Grain number per spike
	Discarted traits
StemBio	Stem biomass
SpkBio	Spike biomass
SWA	Spike weight per area
FLL	Flag leaf length
FLW	Flag leaf width
FLFW	Flag leaf fresh weight
FLDW	Flag leaf dry weight
LRM	Leaf rolling index at morning

## Sheet: Data
				Seedling traits (Rhizoslide experiment)											Shovelomics traits																Field traits - Dry year
Genotype	Geno	Type	YOR	TRL	Surface	Volume	Diameter	PRL	SDW	MRA	MVA	LVA	RN	RoA	DTA	TN	SDW	RDW	RSR	SRN	TRN	AcH	Ff	tpSL	Dpth	Dpth_mW	mSW	mGS	NoG	RoA	PGY	AGB	DTH	PEM	FLA	GNA	HI	PH	RWC	SLW	CT	SNA	GNS	LRN	TKW	StemBio	SpkBio	SWA	FLL
Acsad 65	Acs	Cultivar	1965	97.6261	17.3318	0.249516	0.0568421	26.8777	15.45	30.8682	10.0183	48.6167	5	90.58	117.75	2.6875	9.3875	0.226812	0.0243402	5.0625	29.5625	139.39	0.119606	259.992	19.1555	7.49318	0.0538541	0.00151634	312.875	60.1471	1.64463	3.48619	107	248.81	1273.48	4705.18	0.442712	62.6667	77.855	0.0798641	27.3333	261.905	18.2545	2.66667	32.76	2.55274	0.933452	2.47476	15.4967
Altar 84	Alt	Cultivar	1984	95.3535	16.6337	0.23697	0.0553277	27.0122	13.4583	26.9573	10.7017	43.2436	5.16667	72.8008	116.75	2.9375	9.46875	0.215562	0.0235068	5	29.75	112.226	0.140157	229.346	23.0869	5.27057	0.0584814	0.00133767	281.562	49.3863	1.70238	3.3456	106	201.19	1241.81	4951.2	0.503391	66.6667	80.03	0.0759091	26.6667	229.762	21.5915	2	34.0533	2.43512	0.910476	2.59429	15.55
Bidi 17	Bid	Landrace	1930	113.551	20.3088	0.295444	0.0557957	26.9499	18.275	28.4422	12.755	40.4583	6	76.165	126	2.25	11.4125	0.296375	0.0258724	5.5	31.5625	110.324	0.192252	327.718	16.6488	6.42373	0.0609346	0.00202849	440.938	55.5609	1.84376	4.27298	114	190.476	1813.74	4768.93	0.41258	73.3333	83.8025	0.0849389	25	217.857	22.1029	4.33333	36.8667	3.21238	1.0606	2.8306	19.5133
Bousselem	Bou	Cultivar	2007	86.0704	14.8119	0.207102	0.0547523	26.169	13.8083	37.9979	20.0858	49.7325	4.91667	90.2292	120.75	3.25	11.8	0.255125	0.0218399	5	29.3125	95.922	0.174058	262.275	17.7996	7.58054	0.0618507	0.00203148	317.562	58.4793	1.67011	3.55869	108	208.333	1380.44	4591.13	0.456183	63	79.6584	0.089593	27.3333	226.19	20.1254	2.66667	35.4933	2.57464	0.984048	2.61976	17.8
Boutaleb	Bot	Cultivar	2014	97.7028	17.2257	0.247593	0.056033	25.9675	15.1333	31.9673	16.58	44.1942	5	76.84	122.5	2.5625	11.425	0.246562	0.0221604	5.125	32.3125	86.2646	0.225738	302.05	17.2393	6.24712	0.0586046	0.00209855	443.938	53.2529	1.89477	3.89774	109	201.19	1283.11	5029.81	0.446104	63	77.7645	0.090027	26	253.571	19.8096	2	34.1467	2.82024	1.0775	2.79881	16.55
Capeiti	Cap	Cultivar	1940	107.018	18.1692	0.251724	0.0536244	25.9125	14.5917	32.1297	17.1192	45.6125	5.58333	79.2558	116.25	3.375	10.7063	0.211812	0.0194564	5.5625	32.1875	85.96	0.164589	236.45	17.2258	6.4206	0.0498838	0.00128791	331.5	52.0192	1.57602	3.35786	107	227.381	1290.66	3685.01	0.373863	62.3333	79.8801	0.0784315	27.3333	235.714	15.4022	2.66667	34.4133	2.58405	0.77381	2.05619	15.5833
Cirta	Cir	Cultivar	2000	96.1275	17.4831	0.25885	0.0577136	25.7255	15.425	32.0975	12.3075	44.7917	5.25	83.2508	124	2.375	8.4125	0.202813	0.0234882	4.9375	28.625	95.0882	0.193313	265.736	20.0243	5.26754	0.0578378	0.00165544	358.188	51.696	1.94847	3.21655	106	180.952	1496.29	4076.76	0.451441	63.3333	81.2565	0.0802254	26.3333	201.19	20.3581	3.66667	35.6533	2.30357	0.912976	2.37631	17.0433
Gloire de Montgolfier	Glo	Landrace	1980	112.473	18.1319	0.23711	0.0504095	27.5802	16.45	20.0963	9.75583	31.3825	5.41667	54.575	128.25	2.375	14.9	0.453812	0.0336305	4.0625	34.3125	100.507	0.278811	420.644	17.0243	6.96387	0.0635831	0.00209269	609.312	50.9844	1.59576	3.83012	115	195.238	1712.74	3748.77	0.330588	77.6667	83.9101	0.0774772	25.6667	188.095	19.9244	1.33333	33.5333	2.88643	0.94369	2.1994	18.3067
GTA dur	GTA	Cultivar	1972	95.4762	16.621	0.233781	0.0547891	25.9239	14.2833	34.7036	21.0483	47.0092	5.41667	84.9242	119.25	2.875	9.2875	0.222937	0.0258822	4.8125	32	96.4555	0.191661	288.126	18.8514	5.32044	0.0620462	0.001453	437.125	55.4419	1.99196	4.18952	108	188.095	1470.89	6210.91	0.514706	61.6667	75.5723	0.087356	28.6667	241.667	25.5825	2.66667	34.7467	3.0119	1.17762	3.345	16.5367
Guemgoum R'khem	Gue	Landrace	1960	122.726	20.8004	0.285724	0.0534279	28.5181	18.2083	23.9048	6.785	37.4083	5.83333	65.7575	125.25	2.4375	12	0.275688	0.0237339	4.75	28.0625	90.6323	0.214478	307.259	15.1774	7.42678	0.0586168	0.00228746	413.75	54.7304	1.47248	4.3956	118	145.238	1837.91	4012.64	0.409411	80.6667	82.5562	0.0816493	25.6667	211.905	19.049	4	43.9333	3.345	1.0506	2.83071	20.79
Hedba 3	Hed	Landrace	1921	114.608	19.3143	0.265045	0.0536385	26.6285	16.575	22.7323	12.895	33.1433	5.33333	61	128	2.6875	10.2467	0.261067	0.023939	4.93333	30.7333	81.8404	0.229669	292.524	16.2721	5.5182	0.0584406	0.00218168	399.312	48.9237	1.81871	4.10833	114	190.476	1970.19	5307.24	0.412063	84	82.195	0.0781369	25.3333	250	20.6456	3	32.9333	3.05512	1.05321	2.79298	21.1467
INRAT 69	Inr	Cultivar	1969	101.694	17.2586	0.237805	0.0533704	25.1794	14.375	22.0833	11.8292	32.9142	5.58333	55.1642	116.5	2.8125	9.7125	0.25125	0.0273935	5.4	32.5625	72.4205	0.244619	244.579	13.7325	4.48845	0.0775541	0.00151881	404	42.6601	1.16842	3.77893	106	186.905	1555.86	3739.24	0.311008	56.6667	84.1928	0.0823627	24.3333	244.048	15.5815	3.66667	31.9733	2.7831	0.995833	2.19679	17.27
Korifla	Kor	Cultivar	1987	89.043	15.0461	0.20775	0.0527535	24.0327	12.1417	26.6982	13.0133	38.1767	5.16667	67.995	120.75	3.75	11.8687	0.25925	0.0215906	4.6875	34.3125	106.234	0.158574	278.079	18.7484	5.74715	0.0574976	0.0015287	433.562	51.6054	2.08264	3.70786	107	186.905	1162.61	5321.1	0.482627	61	78.3063	0.0876128	25.6667	213.095	25.1995	2.33333	33.48	2.68857	1.01929	2.78929	15.23
Langlois	Lan	Landrace	1930	108.239	18.4866	0.255992	0.0538779	28.0571	14.475	22.7099	9.245	34.22	5.08333	60.8417	127.25	2.3125	11.4562	0.230812	0.0197098	4.73333	28.6	119.578	0.170312	304.252	17.5089	5.87787	0.0610577	0.00264839	348.188	61.8156	1.69689	4.62607	117	222.619	1451.81	4577.3	0.340737	88.6667	81.576	0.07765	26.3333	241.667	18.9665	3	34.0933	3.61286	1.01321	2.57869	16.29
Mansourah	Man	Cultivar	2012	103.441	16.8645	0.223992	0.0513892	28.7092	15.85	32.9168	10.1225	48.9658	5.41667	91.9058	121	2.6875	9.54667	0.154563	0.0166723	4.875	28.6875	92.3408	0.158925	209.132	18.1533	6.46646	0.065415	0.00216163	225.75	49.3727	1.7742	3.61	110	214.286	1483.4	4053.08	0.41202	57	79.4298	0.0855248	27.3333	229.762	17.5937	2	36.68	2.64976	0.960238	2.46119	17.39
Massinissa	Mas	Cultivar	2012	89.8424	15.6279	0.220681	0.0547039	25.9152	13.1917	37.4047	22.9	46.9717	5	89.3375	120	2.625	9.21875	0.193625	0.020665	4.73333	26.5333	80.5654	0.185948	235.678	16.1812	6.39009	0.0570426	0.00147689	320.625	61.438	2.01472	4.14769	106	222.619	1223.45	5978.7	0.493572	56	79.0594	0.0854539	29	224.762	26.4944	2	34.2933	3.0596	1.0881	3.14224	15.0167
MBB	MBB	Landrace	1930	99.2968	16.5037	0.222972	0.0527365	27.5313	17.8083	32.3672	12.8825	45.9133	5.08333	84.6208	126	2.875	14.1813	0.289813	0.0204896	4.8125	31	93.2272	0.199135	286.901	15.2152	6.20259	0.0632218	0.00155509	394	47.2374	1.61848	4.7456	116	232.143	1305.01	4597.74	0.326999	70	83.3002	0.0822407	27	251.19	18.3447	2	33.7467	3.57643	1.16917	2.72786	16.8367
Megress	Meg	Cultivar	2011	102.241	17.4497	0.24235	0.0538086	27.3612	15.475	31.9198	16.4233	44.9108	5.41667	78.6733	119.25	2.8125	11.0312	0.188188	0.0169556	5.25	29.5625	84.64	0.189622	258.309	15.0278	5.30026	0.0568449	0.00134936	396.5	45.776	2.0312	3.11893	107	167.857	1287.05	3653.56	0.45056	48	79.5698	0.0850245	25	208.929	17.4592	2	38.66	2.26161	0.857321	2.28446	14.695
Mexicali75	Mex	Cultivar	1975	103.042	18.2988	0.26368	0.0558634	28.5041	15.1167	36.5991	16.72	44.9991	5.83333	84.8133	123	2.3125	9.2	0.230063	0.0250719	4.75	28.0625	92.1524	0.214444	301.204	15.6872	6.32908	0.0617681	0.00207696	425.188	51.1817	2.1087	4.59845	108	242.857	1474.84	5266.97	0.372725	60.6667	81.2229	0.0804026	25.6667	292.857	18.0097	4	32.68	3.43643	1.16202	2.91357	16.0767
Montpellier	Mon	Landrace	1965	83.4086	13.9018	0.189544	0.0516383	23.4323	11.1667	15.9358	3.68833	36.8155	5.08333	49.6583	128	2.5	10.9813	0.236875	0.0216255	5.25	30.3125	86.2693	0.195302	256.991	14.6416	6.2175	0.0590608	0.00227378	324.125	60.1237	1.49708	3.67286	107	201.19	1815.35	3847.57	0.311705	57.6667	83.1602	0.0853623	25.6667	209.524	18.3398	4.33333	29.76	2.6975	0.975357	2.12619	18.8167
Ofanto	Ofa	Cultivar	1990	100.227	17.3675	0.244304	0.0542998	26.8828	13.9417	25.3491	14.5617	35.4042	4.91667	56.4233	121	2.75	10.0437	0.186125	0.0187832	4.3125	26.375	105.073	0.174534	247.635	17.0068	6.296	0.0605309	0.00185328	306.333	52.6883	1.55797	2.63893	106	213.095	1218.22	3279.91	0.39	53.3333	76.5271	0.0852429	28	191.667	17.4432	2	34.9867	1.89321	0.745714	1.89417	14.3967
Oued El Berd	OEB	Cultivar	2013	98.3995	17.4765	0.25179	0.0563536	29.8152	15.5833	35.0446	12.1567	46.7883	5.08333	89.7742	123	2.8125	8.7875	0.248938	0.0289754	4.5625	28.9375	99.3503	0.204414	312.063	16.096	6.18865	0.0584838	0.00191972	411.125	57.0757	1.92554	3.32393	108	220.238	1238.53	3366.54	0.368969	63.3333	81.3014	0.0787135	28.3333	184.524	18.3243	2.33333	37.04	2.41143	0.9125	2.13024	15.6933
OZ368	OZ	Landrace	1936	108.449	19.1664	0.276749	0.0554859	27.0293	16.0833	27.2874	9.8325	41.7542	5.83333	76.6775	127.75	2.5625	12.35	0.254563	0.0206327	5.1875	30.3125	94.5608	0.193493	283.385	13.9169	6.37464	0.0562561	0.00231187	348.125	52.7428	1.97739	4.545	114	200	2146	4478	0.388525	71.6667	84.0821	0.0760759	26.6667	228.571	19.5802	3.66667	39.4933	3.42179	1.12321	2.89643	21.3267
Polonicum	Pol	Cultivar	1973	100.417	17.0535	0.235679	0.0533655	23.8641	14.7833	24.4388	12.2642	36.2733	5.66667	65.835	117.5	3.0625	12.0375	0.315	0.0265256	5.4	37.375	95.2576	0.210591	332.485	15.4923	5.9058	0.0557107	0.000806002	618	49.7059	1.99666	4.18964	115	198.81	1985.36	4872.25	0.433324	76	84.6226	0.0813003	25.3333	216.667	22.4597	5	37.0933	3.13357	1.05607	2.85714	20.0833
Sahel 77	Sah	Cultivar	1977	89.4029	14.632	0.195169	0.0517003	25.5927	15.6167	39.4641	24.0758	48.2483	5.41667	86.8583	120	3.125	9.40625	0.244812	0.0265309	4.6875	32.75	93.6251	0.185489	267.977	21.7564	6.65785	0.0619611	0.00243938	354.188	53.4009	1.80579	3.38869	109	232.143	1667.27	4414.65	0.385305	63.3333	79.9773	0.0759953	26	250	17.6463	2.33333	31.2133	2.46345	0.925238	2.22893	20.33
Simeto	Sim	Cultivar	1988	86.2511	14.4014	0.195387	0.0525888	24.4047	13.6917	31.0728	20.345	40.8083	5	73.4608	115.75	3	10.0812	0.200563	0.0192394	4.6875	26.5625	100.683	0.152801	229.902	16.0715	6.18748	0.0629094	0.0016142	331.875	60.3801	1.62281	3.57	106	170.238	1440.28	3896.97	0.465846	60	81.6871	0.0931581	26	208.333	18.6942	3	42.8	2.64393	0.926071	2.59071	16.51
Sitifis	Sit	Cultivar	2011	93.3123	16.0584	0.224245	0.0542109	29.9734	16	35.2262	15.6592	46.6342	5.16667	85.8692	121	3.125	10.9938	0.286812	0.0274889	5.125	32.125	99.524	0.205584	309.685	16.4791	5.14233	0.0597625	0.00177922	458.188	55.1167	2.09888	3.77952	108	197.619	1190.67	5189.96	0.434759	62	78.9333	0.0894333	26.3333	226.19	22.9794	2.33333	31.68	2.69393	1.0856	2.7319	14.4767
Vitron	Vit	Cultivar	1987	87.2085	14.7747	0.203919	0.0541354	27.0976	14.6667	40.3381	18.6492	52.9492	5.16667	99.5233	122.25	2.8125	10.5625	0.183063	0.0188851	4.875	27	81.9539	0.180112	238.851	15.1396	6.22224	0.0550186	0.0020077	359.833	59.1141	2.08198	4.02036	108	213.095	1317.42	4764.43	0.455509	64.6667	81.9444	0.0823542	26	283.333	16.9226	2.66667	38.2533	2.91786	1.1025	2.92488	17.4767
Waha	Wah	Cultivar	1986	102.898	17.4167	0.240251	0.053379	28.6462	13.8	31.705	11.1492	42.2892	5.58333	90.58	120	3.25	10.7938	0.204063	0.0188133	5	30.5625	94.6956	0.188776	260.34	15.3961	6.5029	0.0632224	0.00247581	299.75	57.75	1.8642	3.16643	107	216.667	1256.63	5547.95	0.47	58.3333	81.7392	0.0855259	25.3333	264.286	20.6819	2.33333	30.1333	2.03762	1.12881	2.82024	15.5833
ZB/Fg	ZBF	Cultivar	1983	107.641	17.4065	0.229649	0.0513373	26.6587	14.625	26.7263	13.41	37.05	5.25	66.0542	120.5	2.3125	7.35625	0.178875	0.0243283	4.875	29.25	83.8801	0.212416	266.906	13.1619	6.13133	0.0623353	0.00176711	380.062	50.3616	1.72961	3.62214	108	194.048	1235.27	4331.34	0.415353	57.6667	79.296	0.0841093	28.6667	228.214	18.9674	3	34.6	2.63143	0.990714	2.49012	15.8433
																																0.0302051
[truncated: 27 more columns]
