# Supplementary material for: Enhancing drought resilience in durum wheat: effect of root architecture and genotypic performance in semi-arid rainfed regions
Source: PeerJ. 2025 Mar 27;13:e19096. doi: 10.7717/peerj.19096 (PMC11955194; doi:10.7717/peerj.19096)
Supplement: Table S5 [file peerj-13-19096-s005.xlsx]

## Sheet: Abbreviations
Abbreviation	Seedling traits
TRL	Total root length
Surface	Root surface
Volume	Root volume
Diameter	Root diameter
PRL	Primary root length
SDW	Shoot dry weight
RoA	Root growth opening angle
MRA	Mean root angle
MVA	Maximal root angle
LVA	Least vertical angle
RN	Root number
Abbreviation	Shovelomics traits
RA	Root area
AcH	Area of convex hull
Ff	Filling factor
Depth	Root system depth
Width	Root system width
mW	Maximal root system width
tpSL	Total projected structure length
mFD	Median fractal dimension
NoG	Number of gaps
mGS	Median gap size
mSW	Median structure width
DTH	Days to heading
DTA	Days to anthesis
SRN	Seminal root number
PH	Plant height
RoA	Root growth opening angle
SN	Spike number
TN	Tiller number
NRN	Nodal root number
TRN	Total root number
SDW	Shoot dry weight
StmDW	Stem dry weight
SpkDW	Spike dry weight
RDW	Root dry weigt
RSR	Root to shoot ratio
TPB	Total plant biomass
Abbreviation	Field traits
PGY	Plot grain yield
AGB	Above ground biomass
DTH	Days to heading
PEM	Plant emergence
FLA	Flag leaf area
GNA	Grain number per area
HI	Harvest index
PH	Plant height
RWC	Relative water content
SLW	Specific leaf weight
CT	Canopy temperature
SNA	Spike number per area
GNS	Grain number per spike
LRN	Leaf rooling index at noon
TKW	Thousand kernel weight

## Sheet: Relationships Root&Agronomic 
Supplemental Table S5. Pearson correlation coefficients, based on twenty-two modern cultivars, between root traits measured at seedling and adult plant growth stages and field traits in the dry and wet years
			Dry year
			Wet year
		Field traits
	Traits	PGY	PGY	AGB	AGB	DTH	DTH	PEM	PEM	FLA	FLA	GNA	GNA	HI	HI	PH	PH	RWC	RWC	SLW	SLW	CT	CT	SNA	SNA	GNS	GNS	LRN	LRN	TKW	TKW
Seedling growth stage	TRL	-0.220106	-0.187438	-0.145282	0.385931	0.14552	-0.217849	0.129589	-0.403227	0.0341189	0.131184	-0.286149	0.018577	-0.475202	-0.216357	-0.223155	0.4845	0.0743254	-0.185565	-0.310071	-0.335566	0.010425	-0.118537	0.0472149	0.566587	-0.387407	-0.311576	0.179259	0.198771	-0.230157	-0.0365433
	Surface	-0.117268	-0.0790448	-0.11445	0.371783	0.0333727	-0.219158	0.185656	-0.434627	-0.0279542	0.166213	-0.21686	0.0295582	-0.399337	-0.151202	-0.140073	0.517025	0.020548	-0.18352	-0.360242	-0.385471	0.0324758	-0.137568	0.0314402	0.465846	-0.291642	-0.301694	0.212302	0.229952	-0.253854	0.113961
	Volume	-0.021775	-0.00201896	-0.0855678	0.310814	-0.0571743	-0.189168	0.203788	-0.416244	-0.0755184	0.169704	-0.142446	0.0170003	-0.289587	-0.0871489	-0.0531051	0.482193	-0.0180611	-0.165488	-0.364338	-0.382927	0.0393574	-0.12862	0.0142926	0.320266	-0.186989	-0.272075	0.209202	0.223051	-0.241789	0.209394
	Diameter	0.184611	0.15728	0.0333976	0.0292701	-0.240432	0.0360831	0.190693	-0.198746	-0.178075	0.109946	0.103292	-0.0575983	0.134735	0.054086	0.202511	0.143518	-0.118546	0.0614931	-0.19559	-0.164015	0.110627	-0.0190609	0.0191442	-0.149256	0.112413	-0.121785	0.0747736	0.0711563	-0.0684988	0.380322
	PRL	0.237675	-0.102077	-0.137358	0.292945	-0.10209	0.362348	0.353189	-0.0579678	-0.424141	-0.432759	-0.0558821	-0.13937	-0.176401	-0.463524	-0.253835	-0.0313709	-0.121729	0.302457	-0.103225	-0.0100909	0.190239	-0.236635	0.129983	0.467851	-0.185818	-0.443969	-0.36624	-0.362756	-0.218044	-0.109658
	PRL-MRL(calculated)	0.415456	0.054022	0.0686619	0.0860505	-0.0762223	0.46404	0.308382	0.273781	-0.278864	-0.51447	0.160386	-0.0756452	0.00468844	-0.281953	-0.0798736	-0.17946	-0.00417518	0.359815	-0.032042	0.0883104	0.0321091	-0.200446	0.241157	0.248221	-0.00657455	-0.256675	-0.309964	-0.312283	-0.164161	-0.21037
	SDW	0.113478	-0.0436473	-0.0189379	0.289455	0.338975	0.400067	0.208678	0.102522	0.261296	0.0934711	-0.324262	-0.33329	-0.433778	-0.316401	0.0419503	0.347728	0.0847912	0.154211	-0.269013	-0.267074	-0.0605055	-0.19937	0.112994	0.419178	-0.457749	-0.445757	0.109099	0.129337	-0.0108917	-0.116848
	RoA	0.48647	0.107024	0.188028	-0.0119775	0.0411645	0.478348	0.439422	0.101808	-0.135586	-0.274284	0.324892	-0.252891	0.293813	-0.0190421	0.103202	-0.130025	-0.0948045	0.334893	-0.0611668	-0.0256734	0.208115	-0.184705	0.383541	0.012852	0.0736627	-0.157878	-0.271063	-0.277308	-0.00737937	-0.0150303
	MRA	0.494182	0.300317	0.250964	-0.144885	-0.0144248	0.556786	0.38542	0.211061	-0.0999127	-0.14486	0.276408	-0.122663	0.182192	0.115732	0.01886	-0.142003	-0.164645	0.268001	0.014407	-0.0425419	0.227871	-0.114267	0.347027	-0.0167594	0.0474541	0.0214717	-0.276037	-0.280314	0.031276	-0.0169197
	MVA	0.199772	0.471386	0.282577	-0.283643	-0.0750191	0.170199	0.0178797	0.264297	0.0806445	0.238429	0.251115	0.281388	0.182612	0.380911	-0.0882842	-0.160906	-0.222328	0.0246244	0.243241	0.045343	0.189162	0.143743	0.134298	-0.157686	0.171781	0.480646	-0.148386	-0.146047	0.15153	0.0466185
	LVA	0.415711	0.0905769	0.149479	-0.0430851	0.00013	0.447896	0.405045	0.0132356	-0.158242	-0.191518	0.227036	-0.241117	0.284254	0.017587	0.09389	-0.101463	-0.240592	0.295231	-0.092372	0.00376171	0.262979	-0.0317105	0.334271	-0.0699624	0.00393956	-0.16771	-0.364146	-0.365526	0.0690147	0.06206
	RN	0.072921	0.1083	0.327415	0.0864976	0.360189	-0.144538	0.0918749	0.207289	0.530952	0.0784543	0.0912504	0.224701	-0.362076	0.164495	0.10308	0.487001	0.467903	-0.205993	-0.377815	-0.365656	-0.452655	-0.102548	0.399784	0.371858	-0.194646	0.000199856	0.53679	0.555837	-0.272072	-0.334216
Adult plant growth stage (shovelomics)	RA	0.254156	0.124906	0.252376	-0.306421	0.363681	0.506986	0.0772029	0.463801	0.175025	0.204954	0.199077	0.0828267	-0.235581	0.0890804	0.275323	0.317736	0.0107837	0.23431	0.0667571	-0.591403	-0.081149	-0.313485	0.061263	0.112594	0.166263	0.130262	0.274889	0.26326	-0.380676	-0.0835674
	AcH	-0.00923718	-0.14522	-0.264402	-0.210297	-0.0720587	-0.0183852	0.288373	-0.0481632	-0.174678	-0.290324	0.0663734	-0.0476368	0.285827	0.0574279	0.250648	-0.297758	-0.352364	0.309014	-0.124946	0.237581	0.166795	-0.0304641	-0.0862156	-0.493224	0.149918	0.101522	-0.125893	-0.143823	-0.0855588	0.0732642
	Ff	0.0800607	0.167828	0.347164	0.0907786	0.256731	0.231849	-0.212241	0.300973	0.28127	0.422313	0.0150096	0.100108	-0.43966	-0.0633197	-0.0277431	0.468768	0.342929	-0.0813544	0.0824818	-0.532123	-0.244418	-0.160825	0.0769202	0.509489	-0.0443776	-0.0517995	0.384695	0.393368	-0.197738	-0.0659879
	Depth	0.262955	0.213849	-0.194826	-0.243723	-0.0322495	0.17401	0.337431	-0.0301784	-0.0872192	-0.150575	0.0848586	-0.105675	0.103592	0.428899	0.100527	0.0447757	-0.439753	0.135111	-0.287444	-0.210667	0.127177	-0.275944	-0.0325473	-0.278744	0.122248	0.0855503	-0.055994	-0.0506718	-0.32153	0.0238385
	Width	-0.153426	-0.377113	-0.164249	-0.103433	-0.0666598	-0.0441652	0.128703	-0.0438203	-0.185344	-0.306224	0.015381	-0.0444455	0.27256	-0.271515	0.247142	-0.380631	-0.133118	0.284837	0.0270316	0.385852	0.123851	0.196558	-0.0463221	-0.430077	0.0612477	-0.00771059	-0.135061	-0.161895	0.137687	0.0514606
	mW	-0.213926	-0.394478	-0.215842	-0.35459	0.208505	-0.0927161	0.224771	-0.242188	-0.0569246	0.0675902	0.0505966	0.157509	0.219446	0.166066	0.284903	-0.111621	-0.229917	0.166772	-0.12058	0.198715	0.133242	0.360397	-0.0459815	-0.416775	0.0940036	0.160248	-0.122568	-0.12854	-0.160347	0.0774368
	tpSL	0.486885	0.210987	0.357309	-0.268818	0.539238	0.332592	0.0188794	0.500028	0.253741	0.172424	0.254563	0.178618	-0.0749122	0.158675	0.454791	0.302043	0.0653065	0.138666	0.0158744	-0.561818	-0.115526	-0.241826	-0.0222116	0.0567323	0.305396	0.244666	0.412289	0.413665	-0.198291	-0.0760479
	mFD	0.0556782	0.18444	0.311065	0.0211699	0.458822	0.234126	-0.214384	0.392025	0.517182	0.401093	-0.0836031	0.0162825	-0.463778	-0.00583698	0.160724	0.415309	0.500573	-0.103457	0.0575395	-0.45818	-0.292705	-0.237269	0.0169163	0.42766	-0.10809	0.0164773	0.578336	0.583181	-0.0623203	-0.185873
	NoG	0.340543	0.255494	0.465253	-0.108202	0.607615	-0.00174301	-0.238569	0.499797	0.475614	0.351811	0.174054	0.348358	-0.113613	0.169116	0.444904	0.376468	0.261266	-0.0784006	0.0502456	-0.456969	-0.274922	-0.0598047	-0.0695297	0.152694	0.259647	0.324572	0.608784	0.624241	0.0064014	-0.0599016
	mGZ	0.123026	0.0924223	-0.00351993	-0.182859	-0.110301	0.66823	0.259537	0.197505	-0.140134	0.0217064	0.223113	-0.357606	-0.00257576	-0.0531369	-0.209534	-0.0749093	-0.324049	0.340018	0.175439	-0.320266	0.148698	-0.429203	0.383506	0.0680175	-0.0619509	-0.19373	-0.362947	-0.389443	-0.301685	0.0484947
	mSW	-0.691717	-0.12655	-0.0264348	0.135296	-0.197065	-0.150768	-0.119273	-0.134207	0.175254	0.17654	-0.274936	0.0853896	-0.581539	0.0173202	-0.28463	0.391548	0.262031	-0.216298	0.0477348	-0.0585004	-0.197296	-0.0911615	0.0871552	0.317498	-0.390119	-0.0479663	0.132795	0.118766	-0.230794	-0.148286
	DTH	0.545044	0.211095	0.18213	-0.0382321	0.201394	0.848879	0.205465	0.319007	-0.028606	-0.089806	0.0880402	-0.446004	-0.117308	-0.047274	-0.00213581	-0.00973307	-0.0776263	0.247164	0.00498233	-0.390628	0.105958	-0.406187	0.114238	0.188971	0.0222326	-0.293376	-0.00846025	-0.0128742	-0.12774	-0.0270708
	DTA	0.568811	0.22987	0.0723376	0.045991	0.0474631	0.721012	0.152558	0.183999	-0.200835	-0.08738	0.0896809	-0.477524	-0.0207852	-0.113041	-0.0687292	-0.0630752	-0.186077	0.202831	0.0486665	-0.372591	0.155049	-0.45707	0.0373906	0.172601	0.0831002	-0.342447	-0.116006	-0.12378	-0.11254	0.080848
	SRN	-0.19921	-0.119119	0.152791	0.141381	0.269106	-0.403806	-0.135562	-0.225804	0.272547	0.285144	-0.018007	0.309456	-0.134213	0.208292	0.227685	0.669125	0.385024	-0.324918	-0.124064	-0.210469	-0.431267	0.188917	0.215643	0.286574	-0.180636	0.0281016	0.33459	0.361061	-0.118185	-0.0155002
	PH	-0.250429	-0.375714	0.0310447	-0.128934	0.325457	-0.234279	0.130465	-0.49656	0.141585	0.450253	-0.0317181	0.0413179	-0.191264	0.239946	0.335108	0.802562	0.144067	-0.464223	-0.0721186	-0.500207	-0.274606	-0.0344613	0.204493	0.00542858	-0.197334	0.00349304	0.106472	0.0960638	-0.241845	0.193536
	RoA	0.182164	0.27333	0.018817	-0.128529	-0.187248	0.136876	0.337813	-0.0378291	-0.293935	-0.076642	0.342525	0.0486654	0.456098	0.133167	0.0824508	-0.449449	-0.328936	0.280737	0.332243	0.28449	0.430316	-0.233438	0.124707	-0.24371	0.285904	0.317465	-0.267759	-0.304737	0.10009	0.275936
	SN	0.186029	0.0241259	-0.167664	-0.4696	0.0718101	-0.170819	-0.0750494	0.132424	-0.186692	-0.479406	0.131617	0.206629	0.265964	0.376075	0.125817	-0.143258	-0.0364303	-0.208491	0.214372	0.113728	-0.205619	-0.152544	-0.126449	-0.276897	0.232965	0.426098	-0.240829	-0.237991	-0.027827	-0.189813
	TN	-0.0198045	-0.0481905	-0.179423	-0.51519	0.0607145	-0.283965	-0.094649	0.16327	-0.053271	-0.392328	0.0987342	0.267898	0.174149	0.401047	0.198463	-0.0792978	0.0190036	-0.158945	0.142885	0.153394	-0.246027	-0.113551	-0.141973	-0.343388	0.211886	0.478802	-0.174025	-0.180383	-0.110843	-0.306542
	NRN	0.0628303	-0.147814	0.205691	-0.424564	0.601257	-0.0601049	-0.133366	0.376824	0.469954	0.193123	0.199077	0.188285	-0.0864729	0.34055	0.512814	0.455045	0.173365	-0.0409022	-0.106687	-0.487342	-0.393418	-0.106489	0.00896957	-0.150167	0.226859	0.285632	0.358151	0.356119	-0.339968	-0.334115
	TRN	0.0618935	-0.147769	0.222503	-0.396981	0.592498	-0.0956291	-0.129402	0.334456	0.457281	0.210832	0.217217	0.22361	-0.0712301	0.360697	0.505346	0.491952	0.182913	-0.0620028	-0.108969	-0.485557	-0.395023	-0.0764945	0.0294684	-0.126111	0.231162	0.294519	0.352355	0.352681	-0.347275	-0.325957
	SDW	0.159449	0.111991	0.0537733	-0.268398	0.336401	-0.233538	-0.16257	0.0802691	0.0905051	0.0663188	0.137463	0.304851	0.188796	0.458975	0.211598	0.201164	0.0885316	-0.504556	0.394108	-0.0436121	-0.49322	-0.121587	0.018997	-0.0968315	0.143418	0.435301	-0.00928045	0.00748729	0.0596391	0.237409
	StmDW	-0.0648366	-0.0233325	-0.0026027	-0.184523	0.312924	-0.455661	-0.217198	-0.0856471	0.164364	0.148787	0.00848313	0.377208	0.139992	0.389756	0.256421	0.289239	0.183255	-0.572932	0.298404	0.0529697	-0.48917	0.0897261	-0.0295695	-0.11075	0.0278139	0.406524	0.0647017	0.0850747	0.147731	0.213679
	SpkDW	0.550497	0.338608	0.143979	-0.291338	0.188516	0.384925	0.0516229	0.391804	-0.122732	-0.151259	0.335311	-0.031726	0.182876	0.337657	-0.0103385	-0.108181	-0.168676	-0.0586474	0.368398	-0.226799	-0.210692	-0.50693	0.112846	-0.00953359	0.308814	0.240473	-0.163851	-0.164786	-0.166161	0.148535
	RDW	0.126971	0.0144906	0.323245	-0.470263	0.47509	0.0732403	0.00319891	0.457206	0.374354	0.124162	0.218652	0.35111	-0.113058	0.380912	0.620399	0.345142	0.258105	0.0325249	-0.0137659	-0.282083	-0.329838	-0.0660111	-0.0367079	-0.219688	0.295028	0.448787	0.433076	0.420393	-0.278357	-0.212305
	RSR	0.00931506	-0.0792679	0.329111	-0.315958	0.239938	0.304026	0.123829	0.472323	0.304779	0.0851529	0.141264	0.132291	-0.289186	-0.00438059	0.490671	0.231351	0.18292	0.50341	-0.330103	-0.315345	0.0269635	0.019779	0.00712654	-0.105141	0.175523	0.0925128	0.426134	0.399827	-0.373257	-0.402559
	TPB	0.160923	0.110727	0.0630213	-0.278926	0.345937	-0.227622	-0.159936	0.0932982	0.100758	0.0691652	0.142152	0.311093	0.182323	0.463712	0.227668	0.208786	0.0952082	-0.495636	0.387503	-0.0517399	-0.495809	-0.12172	0.0175566	-0.102195	0.1504	0.442548	0.00440336	0.0205137	0.0500025	0.227069
		Pearson correlation coefficients in bold are significant at P≤0.05
